# Supplementary material
Source: publisher figshare collection journal article supplement (https://diabetesjournals.figshare.com/articles/dataset/_/24147744)
Supplement: Supplementary file 2 [file 1]

**Supplementary Table 1**

| <b>Antibody</b>                            | <b>Source</b>  | <b>Catalog Number</b> | <b>Note</b>                |
|--------------------------------------------|----------------|-----------------------|----------------------------|
| Anti-IR-pY1150/1151 (19H6)                 | Cell Signaling | #3024                 | labeled as pY 1152/1153 IR |
| anti-AKT (40D4)                            | Cell Signaling | #2920                 |                            |
| anti-pS473 AKT (D9E)                       | Cell Signaling | #4060                 |                            |
| anti-ERK1/2 (L34F12)                       | Cell Signaling | #4696                 |                            |
| anti-pERK1/2 (197G2)                       | Cell Signaling | #4377                 |                            |
| anti-HSL                                   | Cell Signaling | #4107                 |                            |
| anti-pS563 HSL                             | Cell Signaling | #4139                 |                            |
| anti-IR-pY960                              | Millipore      | #07-838               | labeled as pY962           |
| anti-IR (CT-3)                             | Millipore      | MABS65                |                            |
| anti-CEACAM1                               | Invitrogen     | #MA5-29684            |                            |
| anti-ACTIN (C4)                            | Santa Cruz     | Sc-47778              |                            |
| anti-PKC $\epsilon$                        | BD Biosciences | #610086               |                            |
| anti-Na-K ATPase                           | Abcam          | #ab7671               |                            |
| anti-GAPDH                                 | Cell Signaling | #5174                 |                            |
| anti-rabbit immunoglobulin G (IgG) (H + L) | Cell Signaling | #5151                 |                            |
| anti-mouse IgG (H + L)                     | Cell Signaling | #5470                 |                            |

## Supplementary Table 2

Srebp1 FW: 5'-GGAGCCATGGATTGCACATT-3',  
RV: 5'-GGCCCCGGAAGTCACTGT-3'

Scd1 FW: 5'-TTCTTGCGATACTCTGGTGC-3',  
RV: 5'-CGGGATTGAATGTTCTTGTCTG-3'

Acc1 FW: 5'-GATGAACCATCTCCGTTGGC-3',  
RV: 5'-GACCCAATTATGAATCGGGAGTG-3'

Fasn FW: 5'-TCGTGATGAACGTGTACCGG-3',  
RV: 5'-CGGGTGAGGACGTTTACAAAG-3'

Agpat3 FW: 5'-CTGCTTGCCTACCTGAAGACC-3',  
RV: 5'-GATACGGCGGTATAGGTGCTT-3'

Dgat1 FW: 5'-TCCGTCCAGGGTGGTAGTG-3',  
RV: 5'-TGAACAAAGAATCTTGCAGACGA-3'

Dgat2 FW: 5'-GCGCTACTTCCGAGACTACTT-3',  
RV: 5'-GGGCCTTATGCCAGGAACT-3'

Cd36 FW: 5'-ATGGGCTGTGATCGGAACTG-3',  
RV: 5'-GTCTTCCCAATAAGCATGTCTCC-3'

Slc27a2 FW: 5'-TCCTCCAAGATGTGCGGTACT-3',  
RV: 5'-TAGGTGAGCGTCTCGTCTCG-3'

Fabp4 FW: 5'-ATCAGCGTAAATGGGGATTGG-3',  
RV: 5'-GTCTGCGGTGATTCATCGAA-3'

G6pc FW: 5'-CGACTCGCTATCTCCAAGTGA-3',  
RV: 5'-GGGCGTTGTCCAAACAGAAT-3'

Pepck FW: 5'-CCACAGCTGCTGCAGAACA-3',  
RV: 5'-GAAGGGTCGCATGGCAAA-3'

Gck FW: 5'-CTGTTAGCAGGATGGCAGCTT-3',  
RV: 5'-TTTCCTGGAGAGATGCTGTGG-3'

Cpt1a FW: 5'-CTCCGCCTGAGCCATGAAG-3',  
RV: 5'-CACCAGTGATGATGCCATTCT-3'

Pparg FW: 5'-GGAAGACCACTCGCATTCTT-3',  
RV: 5'-GTAATCAGCAACCATTGGGTCA-3'

Lpl FW: 5'-TTGCCCTAAGGACCCCTGAA-3',  
RV: 5'-TTGAAGTGGCAGTTAGACACAG-3'

Lipe FW: 5'-GATTTACGCACGATGACACAGT-3',

RV: 5'-ACCTGCAAAGACATTAGACAGC-3'

Abhd5 FW: 5'-TGGTGTCCCACATCTACATCA-3',

RV: 5'-CAGCGTCCATATTCTGTTTCCA-3'

Plin1 FW: 5'-CTGTGTGCAATGCCTATGAGA-3',

RV: 5'-CTGGAGGGTATTGAAGAGCCG-3'

Glut4 FW: 5'-GTGACTGGAACACTGGTCCTA-3',

RV: 5'-CCAGCCACGTTGCATTGTAG-3'

Pcx FW: 5'-CTGAAGTTCCAAACAGTTCGAGG-3',

RV: 5'-CGCACGAAACACTCGGATG-3'

Gapdh FW: 5'-CCTGCTTCACCACCTTCTTGAT-3',

RV: 5'-TGTGTCCGTCGTGGATCTGA-3'

Hibch FW: 5'-GTGGAGGCGTCATAACGCTC-3',

RV: 5'-AGGAATGTGTCAGGGTCTTGT-3'

Lvd FW: 5'-GGACGGCGAGTTTCCAGTT-3',

RV: 5'-CTCCTCGTTTAGCCCGTTGA-3'

Acadm FW: 5'-AGGGTTTAGTTTTGAGTTGACGG-3',

RV: 5'-CCCCGCTTTTGTTCATATTCCG-3'

Dbt FW: 5'-AGACTGACCTGTGTTTCGCTAT-3',

RV: 5'-GAGTGACGTGGCTGACTGTA-3'

**Supplementary Table 3. VIP list-biorep-TIC normalization with HMDB**

|                                                                                                                               | HMDB        | Comp. 1 |
|-------------------------------------------------------------------------------------------------------------------------------|-------------|---------|
| calcitroic acid                                                                                                               | HMDB0006472 | 1.981   |
| ALANINE                                                                                                                       | HMDB0000161 | 1.8231  |
| TYROSINE                                                                                                                      | HMDB00158   | 1.819   |
| Docosapentaenoic acid                                                                                                         | HMDB0006528 | 1.8118  |
| L-CARNITINE                                                                                                                   | HMDB0000062 | 1.8053  |
| GLUTAMINE                                                                                                                     | HMDB00641   | 1.7961  |
| Docosatetraenoic acid                                                                                                         | HMDB0002226 | 1.7927  |
| L-Pyroglutamic acid                                                                                                           | HMDB0000267 | 1.7924  |
| (5beta)-Chola-7,9(11)-dien-24-oic acid                                                                                        | 0           | 1.7847  |
| DOCOSAHEXAENOIC ACID                                                                                                          | HMDB0002183 | 1.773   |
| Docosatrienoic acid                                                                                                           | HMDB0002823 | 1.7649  |
| Gluconate                                                                                                                     | HMDB00625   | 1.7099  |
| 1-linoleoyl-sn-glycero-3-phosphoethanolamine                                                                                  | HMDB0011507 | 1.6891  |
| (9E)-11-Methoxy-11-(3-pentyl-2-oxiranyl)-9-undecenoic acid                                                                    | 0           | 1.6712  |
| Arachidonic acid                                                                                                              | HMDB0001043 | 1.6656  |
| ?-Hydroxyisobutyric acid                                                                                                      | HMDB0000729 | 1.6599  |
| Eicosatrienoic acid                                                                                                           | HMDB0002925 | 1.6512  |
| (15R,21S)-18,21,22-Trihydroxy-3-methyl-18-oxido-12-oxo-13,17,19-trioxa-18lambda~5~-phosphadocosan-15-yl 22-methyltricosanoate | #N/A        | 1.6448  |
| lentiginosine                                                                                                                 | 0           | 1.6321  |
| 5212188 (1,2-di-[(9Z,12Z)-octadecadienoyl]-sn-glycero-3-phosphocholine, Mouse metabolite)                                     | HMDB0008138 | 1.631   |
| para-Cresol Sulfate                                                                                                           | HMDB0011635 | 1.624   |
| MFCD00133435 (1-oleoyl-2-hydroxy-sn-glycero-3-phosphocholine)                                                                 | HMDB0002815 | 1.603   |
| Eicosadienoic acid                                                                                                            | HMDB0005060 | 1.6019  |
| Creatine                                                                                                                      | HMDB0000064 | 1.5721  |
| N6-METHYLLYSINE                                                                                                               | HMDB0002038 | 1.567   |
| INDOLE                                                                                                                        | HMDB0000738 | 1.5637  |
| Taurine                                                                                                                       | HMDB00251   | 1.5594  |
| ELAIDIC ACID                                                                                                                  | HMDB0000573 | 1.5414  |
| 1-[(9Z)-hexadecenoyl]-sn-glycero-3-phosphocholine                                                                             | HMDB0010383 | 1.5246  |
| Glutamic acid                                                                                                                 | HMDB00148   | 1.5055  |
| MFCD12546417 (3,4-Dihydroxybenzenesulfonic acid)                                                                              | 0           | 1.5041  |
| Diisopropylphosphate                                                                                                          | HMDB0251359 | 1.4954  |
| Itaconic acid                                                                                                                 | HMDB0002092 | 1.4885  |
| 12-HAS (12-hydroxy stearic acid)                                                                                              | HMDB0061706 | 1.4828  |
| Palmitoyl sphingomyelin                                                                                                       | HMDB0010169 | 1.4456  |
| Palmitic acid                                                                                                                 | HMDB00220   | 1.4451  |
| O-ACETYLCARNITINE                                                                                                             | HMDB0000201 | 1.403   |
| docosaheptaenoic acid                                                                                                         | HMDB0039133 | 1.3959  |
| L-alpha-lysophosphatidylcholine                                                                                               | HMDB0010382 | 1.3881  |
| 1-stearoyl-2-arachidonoyl-sn-glycero-3-phospho-1D-myo-inositol                                                                | 0           | 1.3708  |
| TRANS-ACONITATE                                                                                                               | HMDB0000958 | 1.3675  |
| 1810343 (Glycerol triundecanoate)                                                                                             | HMDB0031089 | 1.3657  |
| Methionine Sulfoxide                                                                                                          | HMDB0002005 | 1.3541  |
| 1-hexadecanoyl-2-[(7Z,10Z,13Z,16Z,19Z)-docosapentaenoyl]-sn-glycero-3-phosphocholine                                          | HMDB0007990 | 1.3523  |
| Pentacosanoic acid                                                                                                            | HMDB0002361 | 1.3489  |
| TRYPTOPHAN                                                                                                                    | HMDB00929   | 1.3429  |
| Aspartate                                                                                                                     | HMDB0000191 | 1.3426  |
| MFCD00273074 (1-Heptadecanoyl-rac-glycerol)                                                                                   | 0           | 1.3382  |
| Deoxycarnitine                                                                                                                | HMDB0001161 | 1.3233  |
| Proline Betaine (Stachydrine)                                                                                                 | HMDB0004827 | 1.3059  |
| Eicosapentaenoic acid                                                                                                         | HMDB01999   | 1.2617  |
| Methionine                                                                                                                    | HMDB00696   | 1.2384  |
| 3-oxopalmitic acid                                                                                                            | HMDB0010733 | 1.2317  |

|                                                                                                                                                                                                                                                             |             |         |
|-------------------------------------------------------------------------------------------------------------------------------------------------------------------------------------------------------------------------------------------------------------|-------------|---------|
| Hippurate                                                                                                                                                                                                                                                   | HMDB00714   | 1.2305  |
| N-Benzylformamide                                                                                                                                                                                                                                           | HMDB0304423 | 1.1943  |
| 3-Methyl-3-buten-1-yl stearate                                                                                                                                                                                                                              | 0           | 1.1928  |
| Phosphoric acid                                                                                                                                                                                                                                             | HMDB0002142 | 1.1846  |
| Cystine                                                                                                                                                                                                                                                     | HMDB0000192 | 1.1752  |
| Tridecanoic acid                                                                                                                                                                                                                                            | HMDB0000910 | 1.1611  |
| (2S)-2,3-Dihydroxypropyl pentadecanoate                                                                                                                                                                                                                     | 0           | 1.1608  |
| (8E)-8-Heptadecenedioic acid                                                                                                                                                                                                                                | 0           | 1.1487  |
| L-Pipecolic acid                                                                                                                                                                                                                                            | HMDB0000716 | 1.1395  |
| 9a,11b-Dimethyl-9-[5-(2-methylcyclopropyl)-2-hexanyl]hexadecahydrocyclopenta[1,2]phenanthro[8a,9-b]oxiren-3-ol                                                                                                                                              | 0           | 1.1369  |
| 1788230 [Dodecanoic acid, 2-hydroxy-1-(hydroxymethyl)ethyl ester]                                                                                                                                                                                           | HMDB0072869 | 1.1327  |
| Methyl (9Z,12Z,16E)-15-hydroperoxy-9,12,16-octadecatrienoate                                                                                                                                                                                                | 0           | 1.1302  |
| L-Lysine                                                                                                                                                                                                                                                    | HMDB0000182 | 1.1234  |
| Creatinine                                                                                                                                                                                                                                                  | HMDB0000562 | 1.1166  |
| Androsterone sulfate                                                                                                                                                                                                                                        | HMDB0002759 | 1.115   |
| 2-Hydroxyhippuric acid                                                                                                                                                                                                                                      | HMDB0000840 | 1.1105  |
| 1-(4Z,7Z,10Z,13Z,16Z,19Z-docosaheptaenoyl)-sn-glycero-3-phosphocholine                                                                                                                                                                                      | HMDB0062307 | 1.0625  |
| Isophthalic acid                                                                                                                                                                                                                                            | HMDB0002107 | 1.0545  |
| (5E,9E)-5,9-Tetracosadienoic acid                                                                                                                                                                                                                           | HMDB0062248 | 1.0445  |
| Nervonic acid                                                                                                                                                                                                                                               | HMDB0002368 | 1.0435  |
| D-Malic acid                                                                                                                                                                                                                                                | HMDB0031518 | 1.0386  |
| L-Arginine                                                                                                                                                                                                                                                  | HMDB0000517 | 1.0338  |
| 13Z,16Z-Docosadienoic Acid                                                                                                                                                                                                                                  | HMDB0061714 | 1.0326  |
| 13(S)-HOTrE (13S-hydroxy-9Z,11E,15Z-octadecatrienoic acid, 15-lipoxygenase product of linolenic acid)                                                                                                                                                       | #N/A        | 1.0121  |
| cIMP                                                                                                                                                                                                                                                        | 0           | 0.99697 |
| Betaine                                                                                                                                                                                                                                                     | HMDB0000043 | 0.99057 |
| (2E)-decenoic acid                                                                                                                                                                                                                                          | HMDB0010726 | 0.98389 |
| DL-Leucine                                                                                                                                                                                                                                                  | HMDB0000687 | 0.98025 |
| (3R,4S,9R,11R)-27-(4-Hydroxyphenyl)-4-methyl-3,9,11-heptacosanetriol                                                                                                                                                                                        | 0           | 0.97575 |
| (3i,5i,22i,25S)-Spirosolan-3-yl 4-O-i-D-glucopyranosyl-i-D-galactopyranoside                                                                                                                                                                                | #N/A        | 0.94889 |
| 3-Methylhexadecanedioic acid                                                                                                                                                                                                                                | 0           | 0.94142 |
| Erucamide                                                                                                                                                                                                                                                   | HMDB0244507 | 0.93517 |
| PALMITOLEIC ACID                                                                                                                                                                                                                                            | HMDB03229   | 0.92822 |
| PHOSPHORYLCHOLINE                                                                                                                                                                                                                                           | HMDB0001565 | 0.92383 |
| 2908 (Piperidine)                                                                                                                                                                                                                                           | HMDB0034301 | 0.91159 |
| Valproic acid                                                                                                                                                                                                                                               | HMDB0001877 | 0.91103 |
| D-Sedoheptulose                                                                                                                                                                                                                                             | HMDB0003219 | 0.89912 |
| Proline                                                                                                                                                                                                                                                     | HMDB00162   | 0.86504 |
| 11(12)-EET (11,12-epoxyeicosatrienoic acid)                                                                                                                                                                                                                 | #N/A        | 0.86468 |
| 11-deoxy Prostaglandin F1                                                                                                                                                                                                                                   | #N/A        | 0.85485 |
| Pentadecanoic acid                                                                                                                                                                                                                                          | HMDB0000826 | 0.83846 |
| 2-chloro Stearic Acid                                                                                                                                                                                                                                       | HMDB0245076 | 0.82593 |
| (1R,9S,12S,13R,14S,17R,18Z,21S,23S,24S,25S,27R)-17-Allyl-1,14,25-trihydroxy-12-(1E)-1-[(1R,3R,4R)-4-hydroxy-3-methoxycyclohexyl]-1-propen-2-yl-23-methoxy-13,19,21,27-tetramethyl-11,28-dioxo-4-azatri cyclo[22.3.1.0-4,9-]octacos-18-ene-2,3,10,16-tetrone | #N/A        | 0.8074  |
| 2-Aminobutnoic acid                                                                                                                                                                                                                                         | HMDB0000452 | 0.80182 |
| Sphingosine                                                                                                                                                                                                                                                 | HMDB00252   | 0.78367 |
| 4-Hydroxybenzaldehyde                                                                                                                                                                                                                                       | HMDB0011718 | 0.77884 |
| 4-Methyleneglutamine                                                                                                                                                                                                                                        | 0           | 0.76792 |
| cis-cis 9-12 octadecadienoyl L-Carnitine                                                                                                                                                                                                                    | HMDB0006469 | 0.76347 |
| soyasapogenol A                                                                                                                                                                                                                                             | HMDB0034505 | 0.7568  |
| Prolinamide                                                                                                                                                                                                                                                 | 0           | 0.7563  |
| lysoPC a C28:0                                                                                                                                                                                                                                              | HMDB0029206 | 0.74397 |
| SEROTONIN                                                                                                                                                                                                                                                   | HMDB00259   | 0.73903 |
| Prostaglandin F1± Alcohol                                                                                                                                                                                                                                   | #N/A        | 0.7362  |
| Stearic acid                                                                                                                                                                                                                                                | HMDB00827   | 0.72866 |

|                                                                                                                                                  |             |         |
|--------------------------------------------------------------------------------------------------------------------------------------------------|-------------|---------|
| Adenosine 5'-monophosphate                                                                                                                       | HMDB0000045 | 0.72402 |
| (5Z,7E)-9,10-Secocholesta-5,7,10-triene                                                                                                          | 0           | 0.72034 |
| Glucose                                                                                                                                          | HMDB00122   | 0.71997 |
| L-Kynurenine                                                                                                                                     | HMDB0000684 | 0.70294 |
| Histamine                                                                                                                                        | HMDB0000870 | 0.68822 |
| ALPHA-KETOGLUTARIC ACID                                                                                                                          | HMDB0000208 | 0.67936 |
| O-ureido-D-serine                                                                                                                                | 0           | 0.66971 |
| PC                                                                                                                                               | HMDB0000564 | 0.6414  |
| PG(16:1(9Z)/20:4(5Z,8Z,11Z,14Z))                                                                                                                 | HMDB0010595 | 0.64089 |
| L-Cysteinylglycine disulfide                                                                                                                     | HMDB0000709 | 0.63368 |
| 235BBF3K97 (Anhydroretinol)                                                                                                                      | HMDB0062447 | 0.6113  |
| cis-4-Decenoyl carnitine                                                                                                                         | HMDB0240585 | 0.61078 |
| N-[(2S,3R)-1-(beta-D-Glucopyranosyloxy)-3-hydroxy-2-octadecanyl]tetradecanamide                                                                  | 0           | 0.58954 |
| 2-Ketohexanoic acid                                                                                                                              | HMDB0001864 | 0.58897 |
| LAURIC ACID (Dodecanoic acid, Plasma)                                                                                                            | HMDB00638   | 0.58754 |
| N,N-DIMETHYLARGININE                                                                                                                             | HMDB0001539 | 0.58733 |
| INDOXYL SULFATE                                                                                                                                  | HMDB0000682 | 0.58545 |
| PHENYLALANINE                                                                                                                                    | HMDB00159   | 0.57911 |
| (2S)-1-Hydroxy-3-(pentadecanoyloxy)-2-propanyl (6Z,9Z,12Z,15Z)-6,9,12,15-octadecatetraenoate                                                     | 0           | 0.56583 |
| ODYA (17-octadecynoic acid)                                                                                                                      | 0           | 0.56464 |
| Labdanolic acid                                                                                                                                  | 0           | 0.54496 |
| Docosanoic acid                                                                                                                                  | HMDB0000944 | 0.53767 |
| (15Z)-9,12,13-Trihydroxy-15-octadecenoic acid                                                                                                    | 0           | 0.53619 |
| Tetraneurin E                                                                                                                                    | 0           | 0.53496 |
| Acetyl-methylcholine                                                                                                                             | #N/A        | 0.52927 |
| Heneicosylic acid                                                                                                                                | HMDB0002345 | 0.47898 |
| Myristic Acid Alkyne                                                                                                                             | 0           | 0.47426 |
| Nicotinamide                                                                                                                                     | HMDB0001406 | 0.46846 |
| ricinelaiddic acid                                                                                                                               | 0           | 0.46487 |
| Valine                                                                                                                                           | HMDB0000883 | 0.45398 |
| Bilirubin                                                                                                                                        | HMDB0000054 | 0.45102 |
| (20Z)-6-Hydroxy-6-oxido-12-oxo-5,7,11-trioxa-2-aza-6lambda-5-phosphapentacos-20-en-9-yl (4Z,7Z,10Z,13Z,16Z,19Z)-4,7,10,13,16,19-docosahexaenoate | #N/A        | 0.44577 |
| CITRULLINE                                                                                                                                       | HMDB0000904 | 0.42988 |
| Methyl (9E)-9-octadecenoate                                                                                                                      | 0           | 0.41841 |
| MFCD22416941 (Oleoyle-L-carnitine)                                                                                                               | HMDB0005065 | 0.41768 |
| Octadecadienoic acid                                                                                                                             | 0           | 0.41135 |
| Propionylcarnitine                                                                                                                               | HMDB00824   | 0.40205 |
| trans-2-Tetradecenoyl-L-carnitine                                                                                                                | HMDB0013329 | 0.39472 |
| LEUCINE                                                                                                                                          | HMDB00687   | 0.392   |
| Palmitoyl-DL-carnitine                                                                                                                           | HMDB00222   | 0.38369 |
| Choline                                                                                                                                          | HMDB0000097 | 0.37055 |
| hydroxycitric acid                                                                                                                               | HMDB0031159 | 0.35567 |
| Erucic acid                                                                                                                                      | HMDB0002068 | 0.35381 |
| L-alpha-Glycerolphosphorylcholine                                                                                                                | HMDB0000086 | 0.35268 |
| MYRISTIC ACID                                                                                                                                    | HMDB00806   | 0.35139 |
| 1-Octen-3-ol                                                                                                                                     | #N/A        | 0.35073 |
| Linolenic acid                                                                                                                                   | HMDB0001388 | 0.31176 |
| Methyl stearate                                                                                                                                  | HMDB0034154 | 0.31162 |
| Eicosenoic acid                                                                                                                                  | HMDB0002231 | 0.29769 |
| Asparagine                                                                                                                                       | HMDB0000168 | 0.29517 |
| 4-Phenolsulfonic acid                                                                                                                            | 0           | 0.27595 |
| (9Z,11R,12Z,15Z)-11-(Stearoyloxy)-9,12,15-octadecatrienoic acid                                                                                  | HMDB0031934 | 0.26266 |
| 4-Indolecarbaldehyde                                                                                                                             | 0           | 0.26137 |
| Cyclopentadecanolide                                                                                                                             | HMDB0034455 | 0.261   |
| Dehydroepiandrosterone sulfate                                                                                                                   | HMDB0001032 | 0.25694 |
| Methyl palmitate                                                                                                                                 | HMDB0061709 | 0.25678 |

|                                                                                                                                                                  |             |          |
|------------------------------------------------------------------------------------------------------------------------------------------------------------------|-------------|----------|
| 2-Hexadecynoic acid                                                                                                                                              | 0           | 0.25165  |
| N-{15-Methyl-3-[(15-methylhexadecanoyl)oxy]hexadecanoyl}-L-serine                                                                                                | 0           | 0.24808  |
| Ornithine                                                                                                                                                        | HMDB03374   | 0.23397  |
| N-Acetylglycine                                                                                                                                                  | HMDB00532   | 0.22728  |
| D-Tryptophan                                                                                                                                                     | HMDB0013609 | 0.22443  |
| L-Threonic acid                                                                                                                                                  | HMDB0000943 | 0.21869  |
| N,N-Diisopropylethylamine (DIPEA)                                                                                                                                | 0           | 0.21594  |
| trans-3-Indoleacrylic acid                                                                                                                                       | HMDB0000734 | 0.19978  |
| a-Linolenic acid                                                                                                                                                 | HMDB0001388 | 0.17891  |
| 6-Methylquinoline                                                                                                                                                | HMDB0033115 | 0.17782  |
| Lysolecithin                                                                                                                                                     | 0           | 0.17284  |
| Decanoylcarnitine                                                                                                                                                | HMDB0000651 | 0.14199  |
| Arachidic acid                                                                                                                                                   | HMDB0002212 | 0.13319  |
| Histidine                                                                                                                                                        | HMDB0000177 | 0.13191  |
| (5Z,13E,15S,17Z)-15-Hydroxy-11-oxoprostano-5,9,13,17-tetraen-1-oic acid                                                                                          | HMDB0002664 | 0.12375  |
| 2-hydroxyvaleric acid                                                                                                                                            | HMDB0001863 | 0.12185  |
| cis,cis-tetradeca-5,8-dienoyl-CoA                                                                                                                                | HMDB0002288 | 0.11859  |
| 2-Amino-4-methylpyrimidine                                                                                                                                       | HMDB0247327 | 0.10911  |
| Diginatigenin                                                                                                                                                    | 0           | 0.10847  |
| (7R)-4-Hydroxy-N,N,N-trimethyl-10-oxo-7-(palmitoyloxy)-3,5,9-trioxo-4-phosphapentacosan-1-aminium 4-oxide                                                        | 0           | 0.10456  |
| ANTHRANILIC ACID                                                                                                                                                 | HMDB0001123 | 0.095831 |
| Myristoleic acid                                                                                                                                                 | HMDB0002000 | 0.089469 |
| Uric acid                                                                                                                                                        | HMDB00289   | 0.079525 |
| (6Z,18R,24S)-21,24,25-Trihydroxy-21-oxido-15-oxo-16,20,22-trioxa-21lambda-5-phosphapentacos-6-en-18-yl (4Z,7Z,10Z,13Z,16Z,19Z)-4,7,10,13,16,19-docosaehexaenoate | #N/A        | 0.07798  |
| Typhasterol                                                                                                                                                      | FDB031232   | 0.068446 |
| 1-Palmitoyl-2-docosaehexaenoyl-sn-glycero-3-phosphocholine                                                                                                       | HMDB0007991 | 0.058815 |
| L-(+) Lactic acid                                                                                                                                                | HMDB0000190 | 0.047189 |
| trans-10-Heptadecenoic acid                                                                                                                                      | HMDB0244268 | 0.040652 |
| 4-Oxoproline                                                                                                                                                     | HMDB0304793 | 0.026734 |
| Glycol distearate                                                                                                                                                | HMDB0032260 | 0.023565 |
| (2R)-3-[(2-Aminoethoxy)(hydroxy)phosphoryl]oxy}-2-[(1Z)-1-octadecen-1-yloxy]propyl (5Z,8Z,11Z,14Z,17Z)-5,8,11,14,17-icosapentaenoate                             | #N/A        | 0.022778 |
| 16-Heptadecynoic acid                                                                                                                                            | HMDB0002259 | 0.020995 |
| 18:0 Lyso PC                                                                                                                                                     | HMDB0010384 | 0.017657 |

Supplementary Table 4.

| Name                                                                                                                                                                                                                                                        | Median Area            |                        |                        |                        |                        |                        |                        |                        |                        |                        |                        |                        |                        |                        |                         |  |
|-------------------------------------------------------------------------------------------------------------------------------------------------------------------------------------------------------------------------------------------------------------|------------------------|------------------------|------------------------|------------------------|------------------------|------------------------|------------------------|------------------------|------------------------|------------------------|------------------------|------------------------|------------------------|------------------------|-------------------------|--|
| Name                                                                                                                                                                                                                                                        | 4A-1                   | 4A-2                   | 4A-3                   | 4A-4                   | 4A-5                   | 4A-6                   | 4A-7                   | 4A-8                   | WT-1                   | WT-2                   | WT-3                   | WT-4                   | WT-5                   | WT-6                   | WT-7                    |  |
| 1-Octen-3-ol                                                                                                                                                                                                                                                | 5.4<br>0E-06           | 5.7<br>8E-06           | 5.4<br>8E-06           | 6.2<br>6E-06           | 6.2<br>0E-06           | 6.0<br>0E-06           | 6.3<br>7E-06           | 5.2<br>4E-06           | 5.8<br>6E-06           | 5.8<br>5E-06           | 5.8<br>2E-06           | 6.5<br>2E-06           | 5.8<br>3E-06           | 5.9<br>4E-06           | 5.2<br>2E-06            |  |
| 11(12)-EET (11,12-epoxyicosatrienoic acid)                                                                                                                                                                                                                  | 5.1<br>4E-05           | 4.0<br>1E-05           | 0.0<br>002<br>916<br>9 | 0.0<br>001<br>252<br>7 | 1.2<br>6E-05           | 8.7<br>7E-06           | 1.5<br>8E-05           | 9.8<br>9E-06           | 6.4<br>8E-06           | 8.2<br>4E-06           | 6.6<br>6E-06           | 9.7<br>4E-06           | 1.3<br>5E-05           | 1.7<br>3E-05           | 9.1<br>8E-05            |  |
| (15R,21S)-18,21,22-Trihydroxy-3-methyl-18-oxido-12-oxo-13,17,19-trioxa-18lambda-5-phosphadocosan-15-yl 22-methyltricosanoate                                                                                                                                | 0.0<br>001<br>568<br>2 | 0.0<br>001<br>380<br>7 | 0.0<br>001<br>518<br>8 | 0.0<br>001<br>648<br>5 | 0.0<br>001<br>581      | 0.0<br>001<br>869<br>1 | 0.0<br>001<br>784<br>8 | 0.0<br>001<br>597<br>6 | 9.9<br>3E-05           | 0.0<br>001<br>543<br>4 | 0.0<br>001<br>130<br>8 | 0.0<br>001<br>112<br>4 | 0.0<br>001<br>374<br>2 | 0.0<br>001<br>276<br>9 | 0.0<br>001<br>308<br>2  |  |
| (15Z)-9,12,13-Trihydroxy-15-octadecenoic acid                                                                                                                                                                                                               | 8.9<br>7E-06           | 1.1<br>7E-05           | 1.3<br>4E-05           | 1.3<br>6E-05           | 1.2<br>6E-05           | 1.0<br>7E-05           | 1.1<br>3E-05           | 1.0<br>6E-05           | 8.4<br>8E-06           | 1.1<br>3E-05           | 1.0<br>8E-05           | 1.1<br>3E-05           | 1.1<br>1E-05           | 1.0<br>6E-05           | 1.0<br>8E-05            |  |
| (1R,9S,12S,13R,14S,17R,18Z,21S,23S,24S,25S,27R)-17-Allyl-1,14,25-trihydroxy-12-(1E)-1-[(1R,3R,4R)-4-hydroxy-3-methoxycyclohexyl]-1-propen-2-yl-23-methoxy-13,19,21,27-tetramethyl-11,28-dioxa-4-azatri-cyclo[22.3.1.0-4,9]-octacos-18-ene-2,3,10,16-tetrone | 6.1<br>8E-05           | 4.6<br>7E-05           | 4.9<br>0E-05           | 4.1<br>7E-05           | 6.7<br>1E-05           | 6.1<br>1E-05           | 4.5<br>1E-05           | 5.9<br>1E-05           | 7.3<br>9E-05           | 7.0<br>2E-05           | 8.1<br>4E-05           | 7.1<br>2E-05           | 6.1<br>6E-05           | 5.7<br>9E-05           | 3.5<br>4E-05            |  |
| (20Z)-6-Hydroxy-6-oxido-12-oxo-5,7,11-trioxa-2-aza-6lambda-5-phosphapentacos-20-en-9-yl (4Z,7Z,10Z,13Z,16Z,19Z)-4,7,10,13,16,19-docosahexaenoate                                                                                                            | 4.3<br>3E-05           | 4.7<br>8E-05           | 4.2<br>3E-05           | 4.2<br>9E-05           | 4.6<br>5E-05           | 5.0<br>1E-05           | 3.9<br>2E-05           | 4.1<br>1E-05           | 3.2<br>0E-05           | 3.9<br>5E-05           | 4.3<br>0E-05           | 4.3<br>5E-05           | 4.6<br>7E-05           | 4.5<br>3E-05           | 3.9<br>6E-05            |  |
| (2E)-decanoic acid                                                                                                                                                                                                                                          | 5.7<br>2E-05           | 6.7<br>6E-05           | 5.0<br>4E-05           | 6.4<br>0E-05           | 6.6<br>5E-05           | 3.8<br>0E-05           | 5.7<br>6E-05           | 4.7<br>7E-05           | 3.9<br>9E-05           | 3.0<br>3E-05           | 3.3<br>1E-05           | 3.5<br>4E-05           | 4.0<br>6E-05           | 6.1<br>8E-05           | 7.5<br>2E-05            |  |
| (2R)-3-[(2-Aminoethoxy)(hydroxy)phosphoryl]oxy]-2-[(1Z)-1-octadecen-1-yloxy]propyl (5Z,8Z,11Z,14Z,17Z)-5,8,11,14,17-icosapentaenoate                                                                                                                        | 0.0<br>001<br>045      | 0.0<br>001<br>355      | 0.0<br>001<br>327      | 0.0<br>001<br>203      | 0.0<br>001<br>035      | 0.0<br>001<br>105      | 0.0<br>001<br>007      | 0.0<br>001<br>213      | 0.0<br>001<br>063      | 7.3<br>2E-05           | 0.0<br>001<br>103      | 9.1<br>9E-05           | 0.0<br>001<br>196      | 0.0<br>001<br>213      | 0.0<br>002<br>075       |  |
| (2S)-1-Hydroxy-3-(pentadecanoyloxy)-2-propanyl (6Z,9Z,12Z,15Z)-6,9,12,15-octadecatetraenoate                                                                                                                                                                | 4.9<br>7E-05           | 5.6<br>7E-05           | 5.8<br>2E-05           | 4.7<br>1E-05           | 4.0<br>0E-05           | 4.6<br>1E-05           | 4.7<br>2E-05           | 5.4<br>5E-05           | 4.5<br>5E-05           | 4.8<br>9E-05           | 4.3<br>3E-05           | 3.8<br>8E-05           | 4.6<br>3E-05           | 4.5<br>5E-05           | 5.6<br>2E-05            |  |
| (2S)-2,3-Dihydroxypropyl pentadecanoate                                                                                                                                                                                                                     | 0.0<br>003<br>978<br>6 | 0.0<br>004<br>257<br>1 | 0.0<br>006<br>275<br>5 | 0.0<br>006<br>796<br>9 | 0.0<br>006<br>383      | 0.0<br>005<br>671      | 0.0<br>006<br>831      | 0.0<br>004<br>849      | 0.0<br>003<br>881      | 0.0<br>005<br>125      | 0.0<br>004<br>134      | 0.0<br>004<br>502      | 0.0<br>004<br>383      | 0.0<br>004<br>279      | 0.0<br>004<br>803       |  |
| (3i,5i,22i,25S)-Spirosolan-3-yl 4-O-i-D-glucopyranosyl-i-D-galactopyranoside                                                                                                                                                                                | 4.4<br>8E-05           | 4.5<br>8E-05           | 4.6<br>7E-05           | 4.6<br>7E-05           | 5.2<br>4E-05           | 5.7<br>7E-05           | 4.4<br>0E-05           | 4.5<br>8E-05           | 3.7<br>4E-05           | 4.6<br>3E-05           | 4.6<br>0E-05           | 4.4<br>3E-05           | 4.5<br>2E-05           | 3.7<br>9E-05           | 3.5<br>4E-05            |  |
| (3R,4S,9R,11R)-27-(4-Hydroxyphenyl)-4-methyl-3,9,11-heptacosanetriol                                                                                                                                                                                        | 0.0<br>004<br>996<br>5 | 0.0<br>003<br>445<br>4 | 0.0<br>003<br>436<br>1 | 0.0<br>003<br>769<br>7 | 0.0<br>002<br>789      | 0.0<br>002<br>142      | 0.0<br>003<br>694      | 0.0<br>004<br>383      | 0.0<br>002<br>633      | 0.0<br>002<br>482      | 0.0<br>001<br>976      | 0.0<br>001<br>974      | 0.0<br>002<br>638      | 0.0<br>002<br>164      | 0.0<br>005<br>758       |  |
| (5beta)-Chola-7,9(11)-dien-24-oic acid                                                                                                                                                                                                                      | 0.0<br>001<br>920<br>8 | 0.0<br>001<br>616<br>3 | 0.0<br>002<br>160<br>8 | 0.0<br>002<br>614<br>3 | 0.0<br>003<br>393      | 0.0<br>002<br>034      | 0.0<br>003<br>229      | 0.0<br>001<br>865      | 0.0<br>001<br>213      | 0.0<br>001<br>369      | 0.0<br>001<br>349      | 0.0<br>001<br>159      | 9.9<br>4E-05           | 9.0<br>001<br>465      | 0.0<br>001<br>490       |  |
| (5E,9E)-5,9-Tetracosadienoic acid                                                                                                                                                                                                                           | 4.3<br>6E-05           | 5.3<br>3E-05           | 4.4<br>6E-05           | 4.7<br>2E-05           | 5.6<br>4E-05           | 4.5<br>8E-05           | 7.2<br>8E-05           | 4.5<br>4E-05           | 3.2<br>8E-06           | 4.0<br>3E-05           | 4.1<br>6E-05           | 5.0<br>4E-05           | 4.6<br>5E-05           | 4.1<br>7E-05           | 4.1<br>8E-05            |  |
| (5Z,13E,15S,17Z)-15-Hydroxy-11-oxoprostano-5,9,13,17-tetraen-1-oic acid                                                                                                                                                                                     | 7.9<br>4E-06           | 9.7<br>0E-06           | 9.3<br>4E-06           | 9.6<br>0E-06           | 9.1<br>5E-06           | 9.7<br>4E-06           | 9.0<br>3E-06           | 8.5<br>8E-06           | 8.6<br>0E-06           | 8.8<br>1E-06           | 8.8<br>2E-06           | 9.9<br>2E-06           | 8.5<br>6E-06           | 8.7<br>6E-06           | 8.3<br>0E-06            |  |
| (5Z,7E)-9,10-Secocholesta-5,7,10-triene                                                                                                                                                                                                                     | 0.0<br>016<br>848<br>4 | 0.0<br>018<br>692<br>9 | 0.0<br>010<br>603<br>4 | 0.0<br>010<br>812<br>3 | 0.0<br>011<br>919      | 0.0<br>005<br>262      | 0.0<br>007<br>536      | 0.0<br>014<br>097      | 0.0<br>010<br>515      | 0.0<br>008<br>221      | 0.0<br>008<br>525      | 0.0<br>011<br>540      | 0.0<br>015<br>855      | 0.0<br>016<br>990      | 0.0<br>023<br>152       |  |
| (6Z,18R,24S)-21,24,25-Trihydroxy-21-oxido-15-oxo-16,20,22-trioxa-21lambda-5-phosphapentacos-6-en-18-yl (4Z,7Z,10Z,13Z,16Z,19Z)-4,7,10,13,16,19-docosahexaenoate                                                                                             | 2.3<br>5E-05           | 2.3<br>1E-05           | 3.1<br>3E-05           | 2.5<br>4E-05           | 3.0<br>1E-05           | 3.4<br>0E-05           | 2.7<br>4E-05           | 2.5<br>1E-05           | 2.3<br>2E-05           | 2.9<br>1E-05           | 3.3<br>5E-05           | 2.8<br>6E-05           | 2.9<br>6E-05           | 2.6<br>8E-05           | 1.9<br>9E-05            |  |
| (7R)-4-Hydroxy-N,N,N-trimethyl-10-oxo-7-(palmitoyloxy)-3,5,9-trioxa-4-phosphapentacosan-1-aminium 4-oxide                                                                                                                                                   | 0.0<br>005<br>296      | 0.0<br>007<br>357      | 0.0<br>005<br>642      | 0.0<br>006<br>179      | 0.0<br>005<br>050      | 0.0<br>006<br>913      | 0.0<br>005<br>412      | 0.0<br>005<br>881      | 0.0<br>005<br>629      | 0.0<br>005<br>178      | 0.0<br>005<br>593      | 0.0<br>006<br>680      | 0.0<br>005<br>817      | 0.0<br>005<br>548      | 0.0<br>006<br>589       |  |
| (8E)-8-Heptadecenedioic acid                                                                                                                                                                                                                                | 5.1<br>8E-05           | 4.3<br>4E-05           | 3.9<br>1E-05           | 3.7<br>7E-05           | 3.3<br>4E-05           | 2.4<br>7E-05           | 5.1<br>1E-05           | 4.3<br>6E-05           | 2.6<br>7E-05           | 1.5<br>5E-05           | 1.6<br>6E-05           | 1.9<br>2E-05           | 2.8<br>0E-05           | 3.1<br>4E-05           | 6.7<br>7E-05            |  |
| (9E)-11-Methoxy-11-(3-pentyl-2-oxiranyl)-9-undecenoic acid                                                                                                                                                                                                  | 0.0<br>043<br>045<br>8 | 0.0<br>046<br>451<br>2 | 0.0<br>046<br>533<br>2 | 0.0<br>044<br>492<br>1 | 0.0<br>041<br>422<br>1 | 0.0<br>039<br>975<br>4 | 0.0<br>045<br>640<br>8 | 0.0<br>050<br>024<br>9 | 0.0<br>029<br>013<br>4 | 0.0<br>028<br>041<br>5 | 0.0<br>030<br>916<br>1 | 0.0<br>027<br>768<br>1 | 0.0<br>032<br>613<br>9 | 0.0<br>037<br>908<br>9 | 0.0<br>050<br>884<br>9  |  |
| (9Z,11R,12Z,15Z)-11-(Stearoyloxy)-9,12,15-octadecatatrienoic acid                                                                                                                                                                                           | 0.0<br>045<br>471<br>5 | 0.0<br>036<br>962<br>7 | 0.0<br>031<br>209<br>4 | 0.0<br>032<br>571<br>4 | 0.0<br>027<br>113      | 0.0<br>019<br>595      | 0.0<br>034<br>751      | 0.0<br>030<br>633      | 0.0<br>033<br>393      | 0.0<br>022<br>204      | 0.0<br>023<br>721      | 0.0<br>023<br>508      | 0.0<br>026<br>995      | 0.0<br>032<br>790      | 0.0<br>053<br>432       |  |
| 1-(4Z,7Z,10Z,13Z,16Z,19Z-docosahexaenoyl)-sn-glycero-3-phosphocholine                                                                                                                                                                                       | 0.0<br>022<br>23       | 0.0<br>033<br>274<br>1 | 0.0<br>041<br>656<br>1 | 0.0<br>038<br>593<br>8 | 0.0<br>035<br>425<br>4 | 0.0<br>041<br>780<br>2 | 0.0<br>029<br>706<br>3 | 0.0<br>030<br>171<br>5 | 0.0<br>022<br>448<br>4 | 0.0<br>027<br>890<br>6 | 0.0<br>026<br>899<br>6 | 0.0<br>030<br>164<br>6 | 0.0<br>026<br>696<br>5 | 0.0<br>031<br>783<br>5 | 0.0<br>031<br>843<br>39 |  |
| 1-[(9Z)-hexadecenoyl]-sn-glycero-3-phosphocholine                                                                                                                                                                                                           | 0.0<br>006<br>276<br>9 | 0.0<br>006<br>992<br>1 | 0.0<br>006<br>381<br>9 | 0.0<br>006<br>462<br>3 | 0.0<br>007<br>627<br>4 | 0.0<br>007<br>322<br>8 | 0.0<br>007<br>055<br>2 | 0.0<br>004<br>837<br>9 | 0.0<br>004<br>605<br>4 | 0.0<br>005<br>180<br>4 | 0.0<br>005<br>341<br>9 | 0.0<br>006<br>516<br>9 | 0.0<br>005<br>539<br>4 | 0.0<br>005<br>219<br>6 | 0.0<br>005<br>843<br>2  |  |
| 1-hexadecanoyl-2-[(7Z,10Z,13Z,16Z,19Z)-docosapentaenoyl]-sn-glycero-3-phosphocholine                                                                                                                                                                        | 0.0<br>031<br>729<br>8 | 0.0<br>029<br>470<br>4 | 0.0<br>029<br>691<br>1 | 0.0<br>036<br>506      | 0.0<br>037<br>226<br>9 | 0.0<br>034<br>481<br>6 | 0.0<br>036<br>717<br>3 | 0.0<br>026<br>531<br>1 | 0.0<br>022<br>547<br>2 | 0.0<br>027<br>940<br>1 | 0.0<br>027<br>673<br>9 | 0.0<br>027<br>990<br>1 | 0.0<br>026<br>990<br>1 | 0.0<br>030<br>742<br>2 | 0.0<br>026<br>795<br>9  |  |



|                                                                                                       |             |             |             |              |              |              |              |             |             |             |             |             |             |             |             |
|-------------------------------------------------------------------------------------------------------|-------------|-------------|-------------|--------------|--------------|--------------|--------------|-------------|-------------|-------------|-------------|-------------|-------------|-------------|-------------|
| 1-linoleoyl-sn-glycero-3-phosphoethanolamine                                                          | 0.00032386  | 0.00032529  | 0.00042709  | 0.00045313   | 0.00038404   | 0.00051998   | 0.00056735   | 0.00030896  | 0.00025506  | 0.00022807  | 0.00020021  | 0.00027238  | 0.00026798  | 0.00018847  | 0.00031448  |
| 1-Palmitoyl-2-docosaheaxenoyl-sn-glycero-3-phosphocholine                                             | 0.00724023  | 0.01056475  | 0.01262582  | 0.00991131   | 0.00849337   | 0.01097331   | 0.00781055   | 0.01052584  | 0.00823587  | 0.00880287  | 0.00903078  | 0.01061671  | 0.0089076   | 0.0097630   | 0.010097100 |
| 1-stearoyl-2-arachidonoyl-sn-glycero-3-phospho-1D-myo-inositol                                        | 0.00125006  | 0.00137494  | 0.00152524  | 0.00169087   | 0.00211275   | 0.00193934   | 0.00216255   | 0.00188852  | 0.00086355  | 0.00143816  | 0.00128304  | 0.00114953  | 0.0013988   | 0.0014870   | 0.00125921  |
| 11-deoxy Prostaglandin F1                                                                             | 0.003031031 | 0.00303073  | 0.00300118  | 0.002002906  | 0.002002582  | 0.003003487  | 0.003003168  | 0.003003172 | 0.002002770 | 0.002002511 | 0.002002455 | 0.002002459 | 0.002002519 | 0.002002519 | 0.003003498 |
| 12-hydroxy stearic acid                                                                               | 0.0010759   | 9.61E-05    | 0.0010209   | 0.00102459   | 0.00104115   | 9.37E-05     | 0.00102434   | 0.0010001   | 6.52E-05    | 7.30E-05    | 6.31E-05    | 7.14E-05    | 0.0010065   | 9.00105     | 0.0011784   |
| 13(S)-HOTrE (13S-hydroxy-9Z,11E,15Z-octadecatrienoic acid, 15-lipoxygenase product of linolenic acid) | 3.30E-05    | 2.54E-05    | 1.89E-05    | 2.29E-05     | 2.54E-05     | 1.18E-05     | 2.38E-05     | 1.44E-05    | 1.23E-05    | 1.58E-05    | 1.03E-05    | 1.39E-05    | 1.54E-05    | 1.84E-05    | 2.57E-05    |
| 13Z,16Z-Docosadienoic Acid                                                                            | 5.07E-05    | 5.93E-05    | 4.73E-05    | 6.47E-05     | 6.33E-05     | 5.03E-05     | 7.11E-05     | 5.20E-05    | 4.26E-05    | 4.08E-05    | 4.76E-05    | 4.55E-05    | 4.25E-05    | 4.24E-05    | 7.25E-05    |
| 16-Heptadecynoic acid                                                                                 | 0.0019632   | 0.001001894 | 0.001001717 | 0.001001578  | 0.001001285  | 0.001001184  | 0.001001687  | 0.001001001 | 0.001001620 | 0.001001343 | 0.001001346 | 0.001001186 | 0.001001524 | 0.001001877 | 0.00200247  |
| 1788230 [Dodecanoic acid, 2-hydroxy-1-(hydroxymethyl)ethyl ester]                                     | 0.0033509   | 0.00020742  | 0.00020023  | 0.0002002104 | 0.0002002353 | 0.001003498  | 0.001003054  | 0.002002735 | 0.001001523 | 0.001001595 | 0.001001499 | 0.001001340 | 0.001001876 | 0.002002139 | 0.003003012 |
| 18:0 Lyso PC                                                                                          | 0.00718201  | 0.01002036  | 0.01281301  | 0.01279434   | 0.01091247   | 0.01148064   | 0.01211980   | 0.0109122   | 0.0105109   | 0.0105133   | 0.0105136   | 0.0105145   | 0.0105145   | 0.0105145   | 0.0105145   |
| 1810343 (Glycerol triundecanoate)                                                                     | 1.41E-05    | 1.45E-05    | 1.39E-05    | 1.54E-05     | 1.47E-05     | 1.18E-05     | 1.53E-05     | 1.39E-05    | 1.48E-05    | 1.36E-05    | 1.45E-05    | 1.62E-05    | 1.64E-05    | 1.72E-05    | 1.61E-05    |
| 2-Amino-4-methylpyrimidine                                                                            | 0.00687859  | 0.0043973   | 0.00452439  | 0.00540354   | 0.00672186   | 0.00494476   | 0.00421769   | 0.0030030   | 0.0048048   | 0.0051051   | 0.0064833   | 0.0049707   | 0.0049584   | 0.0046765   | 0.00417463  |
| 2-Aminobutnoic acid                                                                                   | 0.0031357   | 0.002002279 | 0.002002332 | 0.003003431  | 0.003003699  | 0.003003755  | 0.003003181  | 0.002002975 | 0.002002410 | 0.002002958 | 0.003003235 | 0.002002812 | 0.002002294 | 0.002002449 | 0.004004145 |
| 2-chloro Stearic Acid                                                                                 | 7.90E-05    | 6.26E-05    | 5.31E-05    | 5.89E-05     | 5.04E-05     | 4.21E-05     | 4.80E-05     | 5.00E-05    | 6.54E-05    | 6.65E-05    | 5.30E-05    | 4.72E-05    | 5.57E-05    | 6.10E-05    | 7.56E-05    |
| 2-Hexadecynoic acid                                                                                   | 0.0015427   | 0.001013452 | 0.001011643 | 0.001010489  | 0.001009071  | 0.001007013  | 0.001015292  | 0.001012063 | 0.001012012 | 0.001007393 | 0.001007407 | 0.001007270 | 0.001010062 | 0.001012427 | 0.002002387 |
| 2-Hydroxyhippuric acid                                                                                | 5.28E-06    | 6.27E-06    | 6.19E-06    | 6.10E-06     | 6.21E-06     | 6.28E-06     | 6.81E-06     | 6.52E-06    | 4.80E-06    | 5.54E-06    | 5.72E-06    | 6.10E-06    | 5.65E-06    | 5.28E-06    | 5.36E-06    |
| 2-hydroxyvaleric acid                                                                                 | 0.0036137   | 0.0040404   | 0.004004829 | 0.005005097  | 0.003003964  | 0.005005606  | 0.003003272  | 0.002002979 | 0.003003595 | 0.004004263 | 0.003003946 | 0.005005337 | 0.004004378 | 0.003003913 | 0.003003399 |
| 2-Ketohexanoic acid                                                                                   | 0.0051388   | 0.005005335 | 0.004004105 | 0.007007667  | 0.004004894  | 0.005005809  | 0.006006407  | 0.00700711  | 0.003003939 | 0.004004809 | 0.004004546 | 0.004004505 | 0.004004398 | 0.004004324 | 0.009009598 |
| 235BBF3K97 (Anhydroretinol)                                                                           | 0.0036579   | 0.0075906   | 0.00300394  | 0.003003169  | 0.002002952  | 0.002002879  | 0.003003393  | 0.005005695 | 0.002002365 | 0.005005744 | 0.002002889 | 0.002002928 | 0.006006388 | 0.007007380 | 0.008008312 |
| 2908 (Piperidine)                                                                                     | 0.00509842  | 0.00590074  | 0.00932615  | 0.00785785   | 0.00634177   | 0.00681919   | 0.0068166225 | 0.0087087   | 0.0081081   | 0.0083083   | 0.0092092   | 0.0081081   | 0.0083083   | 0.0075075   | 0.0089089   |
| 3-Methyl-3-buten-1-yl stearate                                                                        | 1.52E-05    | 1.67E-05    | 1.12E-05    | 1.64E-05     | 1.50E-05     | 1.66E-05     | 2.51E-05     | 1.18E-05    | 5.44E-05    | 1.14E-05    | 7.64E-06    | 6.99E-06    | 1.98E-05    | 1.30E-05    | 1.27E-05    |
| 3-Methylhexadecanedioic acid                                                                          | 0.00120319  | 0.000909748 | 0.001000862 | 0.001010687  | 0.0008008497 | 0.001007902  | 0.001012545  | 0.001008748 | 0.001006866 | 0.001007779 | 0.001008614 | 0.001008112 | 0.001009493 | 0.001008447 | 0.003003372 |
| 3-oxopalmitic acid                                                                                    | 6.75E-05    | 4.46E-05    | 3.67E-05    | 4.83E-05     | 4.97E-05     | 2.65E-05     | 5.11E-05     | 5.24E-05    | 1.84E-05    | 2.46E-05    | 2.25E-05    | 2.61E-05    | 3.22E-05    | 3.12E-05    | 7.21E-05    |
| 4-Hydroxybenzaldehyde                                                                                 | 6.74E-05    | 3.02E-05    | 6.93E-05    | 7.90E-05     | 5.58E-05     | 7.55E-05     | 9.62E-05     | 7.19E-05    | 5.48E-05    | 6.31E-05    | 5.67E-05    | 5.81E-05    | 3.95E-05    | 5.95E-05    | 3.48E-05    |
| 4-Indolecarbaldehyde                                                                                  | 0.004406    | 0.005007852 | 0.006006433 | 0.006006984  | 0.006006673  | 0.008008042  | 0.006006286  | 0.007007413 | 0.005005440 | 0.007007913 | 0.008008574 | 0.008008549 | 0.007007249 | 0.005005813 | 0.005005135 |
| 4-Methyleneglutamine                                                                                  | 0.0041731   | 0.0028923   | 0.0025324   | 0.0027604    | 0.002703394  | 0.0032033575 | 0.0027027066 | 0.002002021 | 0.0036036   | 0.0034034   | 0.0028028   | 0.0027027   | 0.0037037   | 0.0035035   | 0.0028028   |
| 4-Oxoproline                                                                                          | 0.0012019   | 0.001001557 | 0.001001711 | 0.001001452  | 0.001001137  | 9.70E-05     | 0.001001372  | 0.001001450 | 0.001001242 | 0.001001161 | 0.001001119 | 0.001001240 | 0.001001733 | 0.001001309 | 0.001001454 |

|                                                                                                                |                        |                        |                        |                        |                         |                         |                         |                        |                         |                         |                         |                         |                         |                         |                         |
|----------------------------------------------------------------------------------------------------------------|------------------------|------------------------|------------------------|------------------------|-------------------------|-------------------------|-------------------------|------------------------|-------------------------|-------------------------|-------------------------|-------------------------|-------------------------|-------------------------|-------------------------|
| 4-Phenolsulfonic acid                                                                                          | 0.0<br>007<br>942<br>3 | 0.0<br>012<br>810<br>5 | 0.0<br>006<br>007<br>8 | 0.0<br>016<br>927<br>7 | 0.0<br>017<br>982<br>2  | 0.0<br>031<br>242<br>1  | 0.0<br>021<br>218<br>6  | 0.0<br>016<br>373<br>7 | 0.0<br>006<br>743<br>4  | 0.0<br>017<br>419<br>1  | 0.0<br>009<br>289<br>2  | 0.0<br>013<br>921<br>4  | 0.0<br>008<br>356<br>4  | 0.0<br>021<br>423<br>5  | 0.0<br>019<br>077<br>4  |
| 5212188 (1,2-di-[(9Z,12Z)-octadecadienoyl]-sn-glycero-3-phosphocholine, Mouse metabolite))                     | 0.0<br>076<br>808<br>5 | 0.0<br>085<br>318<br>2 | 0.0<br>077<br>208<br>9 | 0.0<br>084<br>277<br>8 | 0.0<br>087<br>816<br>7  | 0.0<br>089<br>067<br>2  | 0.0<br>086<br>608<br>9  | 0.0<br>075<br>049<br>9 | 0.0<br>060<br>589<br>8  | 0.0<br>068<br>722<br>8  | 0.0<br>059<br>872<br>8  | 0.0<br>066<br>481<br>2  | 0.0<br>070<br>491<br>1  | 0.0<br>078<br>890<br>7  | 0.0<br>072<br>498<br>0  |
| 6-Methylquinoline                                                                                              | 0.0<br>006<br>724<br>2 | 0.0<br>008<br>027<br>3 | 0.0<br>008<br>263<br>5 | 0.0<br>008<br>684<br>7 | 0.0<br>009<br>143<br>5  | 0.0<br>008<br>717<br>5  | 0.0<br>008<br>540<br>6  | 0.0<br>008<br>671<br>6 | 0.0<br>006<br>921<br>7  | 0.0<br>009<br>584<br>9  | 0.0<br>011<br>964<br>5  | 0.0<br>009<br>317<br>5  | 0.0<br>008<br>077<br>1  | 0.0<br>007<br>156<br>7  | 0.0<br>006<br>986<br>2  |
| 9a,11b-Dimethyl-9-[5-(2-methylcyclopropyl)-2-hexanyl]hexadecahydrocyclopenta[1,2]phenanthro[8a,9-b]oxiren-3-ol | 0.0<br>001<br>133      | 0.0<br>001<br>168<br>3 | 0.0<br>001<br>186<br>1 | 0.0<br>001<br>337<br>9 | 0.0<br>35-<br>0E-<br>05 | 0.0<br>4E-<br>05        | 0.0<br>8.7<br>1E-<br>05 | 0.0<br>001<br>106<br>6 | 0.0<br>6.7<br>4E-<br>05 | 0.0<br>8.0<br>8E-<br>05 | 0.0<br>6.9<br>2E-<br>05 | 0.0<br>7.7<br>2E-<br>05 | 0.0<br>7.7<br>6E-<br>05 | 0.0<br>9.0<br>7E-<br>05 | 0.0<br>7.3<br>5E-<br>05 |
| a-Linolenic acid                                                                                               | 0.0<br>174<br>070<br>7 | 0.0<br>166<br>457<br>1 | 0.0<br>152<br>936<br>5 | 0.0<br>137<br>3<br>3   | 0.0<br>101<br>693<br>1  | 0.0<br>106<br>340<br>7  | 0.0<br>139<br>438<br>2  | 0.0<br>149<br>148<br>2 | 0.0<br>124<br>776<br>6  | 0.0<br>118<br>182<br>4  | 0.0<br>102<br>344<br>3  | 0.0<br>097<br>353<br>9  | 0.0<br>129<br>704<br>8  | 0.0<br>158<br>486<br>2  | 0.0<br>221<br>787<br>9  |
| Acetyl-methylcholine                                                                                           | 0.0<br>062<br>673<br>6 | 0.0<br>055<br>274<br>5 | 0.0<br>011<br>650<br>4 | 0.0<br>010<br>649<br>8 | 0.0<br>015<br>798<br>8  | 0.0<br>015<br>821<br>9  | 0.0<br>060<br>138<br>9  | 0.0<br>061<br>295<br>8 | 0.0<br>028<br>980<br>6  | 0.0<br>025<br>622<br>9  | 0.0<br>024<br>003<br>1  | 0.0<br>020<br>014<br>6  | 0.0<br>075<br>858<br>9  | 0.0<br>077<br>269<br>9  | 0.0<br>050<br>531<br>3  |
| Adenosine 5'-monophosphate                                                                                     | 0.0<br>001<br>351<br>6 | 0.0<br>007<br>342<br>6 | 0.0<br>010<br>976<br>6 | 0.0<br>006<br>914<br>6 | 0.0<br>2.2<br>0E-<br>05 | 0.0<br>3.5<br>7E-<br>05 | 0.0<br>6.4<br>5E-<br>05 | 0.0<br>001<br>011<br>3 | 0.0<br>3.7<br>2E-<br>05 | 0.0<br>5.9<br>7E-<br>05 | 0.0<br>9.6<br>2E-<br>06 | 0.0<br>0.02<br>424<br>9 | 0.0<br>4.7<br>9E-<br>05 | 0.0<br>6E-<br>05        | 0.0<br>004<br>218<br>2  |
| ALANINE                                                                                                        | 0.0<br>017<br>92       | 0.0<br>010<br>565<br>4 | 0.0<br>013<br>060<br>3 | 0.0<br>015<br>827<br>2 | 0.0<br>017<br>582<br>6  | 0.0<br>015<br>681<br>9  | 0.0<br>017<br>841<br>6  | 0.0<br>009<br>608<br>9 | 0.0<br>013<br>103<br>1  | 0.0<br>010<br>632<br>5  | 0.0<br>009<br>193<br>6  | 0.0<br>010<br>124<br>2  | 0.0<br>009<br>521<br>2  | 0.0<br>010<br>113<br>4  | 0.0<br>011<br>475<br>0  |
| ALPHA-KETOGLUTARIC ACID                                                                                        | 0.0<br>018<br>237<br>5 | 0.0<br>011<br>240<br>5 | 0.0<br>003<br>771<br>4 | 0.0<br>007<br>043<br>7 | 0.0<br>014<br>599<br>2  | 0.0<br>008<br>597<br>8  | 0.0<br>008<br>499<br>8  | 0.0<br>007<br>778<br>5 | 0.0<br>002<br>861<br>5  | 0.0<br>010<br>201<br>6  | 0.0<br>007<br>172<br>2  | 0.0<br>008<br>020<br>3  | 0.0<br>008<br>006<br>4  | 0.0<br>007<br>840<br>8  | 0.0<br>005<br>970<br>9  |
| Androsterone sulfate                                                                                           | 5.8<br>9E-<br>06       | 6.9<br>8E-<br>06       | 6.9<br>1E-<br>06       | 6.7<br>1E-<br>06       | 7.0<br>0E-<br>06        | 7.0<br>1E-<br>06        | 7.5<br>9E-<br>06        | 5.3<br>0E-<br>06       | 6.1<br>3E-<br>06        | 6.2<br>7E-<br>06        | 6.8<br>4E-<br>06        | 6.8<br>0E-<br>06        | 6.2<br>4E-<br>06        | 5.8<br>9E-<br>06        | 5.9<br>7E-<br>06        |
| ANTHRANILIC ACID                                                                                               | 8.4<br>9E-<br>05       | 8.0<br>1E-<br>05       | 0.0<br>001<br>152<br>3 | 0.0<br>001<br>077<br>6 | 7.1<br>5E-<br>05        | 9.4<br>4E-<br>05        | 6.4<br>3E-<br>05        | 9.9<br>8E-<br>05       | 6.9<br>0E-<br>05        | 0.0<br>001<br>587<br>3  | 0.0<br>0.0<br>161<br>3  | 7.0<br>9E-<br>05        | 7.7<br>2E-<br>05        | 6.9<br>9E-<br>05        | 8.3<br>9E-<br>05        |
| Arachidic acid                                                                                                 | 0.0<br>003<br>464<br>7 | 0.0<br>003<br>823<br>2 | 0.0<br>003<br>098<br>8 | 0.0<br>003<br>555<br>3 | 0.0<br>003<br>154<br>1  | 0.0<br>003<br>328<br>7  | 0.0<br>002<br>951<br>4  | 0.0<br>004<br>057<br>8 | 0.0<br>002<br>081<br>8  | 0.0<br>003<br>934<br>6  | 0.0<br>003<br>008<br>5  | 0.0<br>002<br>735<br>5  | 0.0<br>004<br>118<br>7  | 0.0<br>003<br>827<br>1  | 0.0<br>003<br>722<br>8  |
| Arachidonic acid                                                                                               | 0.0<br>080<br>557<br>1 | 0.0<br>089<br>966<br>7 | 0.0<br>100<br>801<br>9 | 0.0<br>096<br>048<br>9 | 0.0<br>078<br>838<br>5  | 0.0<br>077<br>893<br>9  | 0.0<br>097<br>412<br>9  | 0.0<br>076<br>802<br>6 | 0.0<br>052<br>459<br>5  | 0.0<br>068<br>430<br>2  | 0.0<br>053<br>389<br>7  | 0.0<br>057<br>279<br>4  | 0.0<br>068<br>027<br>1  | 0.0<br>072<br>286<br>1  | 0.0<br>088<br>808<br>0  |
| Asparagine                                                                                                     | 0.0<br>048<br>930<br>9 | 0.0<br>017<br>352<br>9 | 0.0<br>017<br>709<br>7 | 0.0<br>022<br>833<br>1 | 0.0<br>030<br>777<br>4  | 0.0<br>020<br>735<br>5  | 0.0<br>025<br>636<br>9  | 0.0<br>015<br>893<br>7 | 0.0<br>020<br>055<br>1  | 0.0<br>024<br>356<br>1  | 0.0<br>022<br>389<br>7  | 0.0<br>021<br>602<br>6  | 0.0<br>023<br>466<br>9  | 0.0<br>023<br>140<br>6  | 0.0<br>016<br>132<br>7  |
| Aspartate                                                                                                      | 0.0<br>004<br>615<br>6 | 0.0<br>006<br>164<br>2 | 0.0<br>006<br>381<br>9 | 0.0<br>006<br>587<br>4 | 0.0<br>003<br>676<br>7  | 0.0<br>006<br>966<br>5  | 0.0<br>007<br>171<br>9  | 0.0<br>003<br>185<br>1 | 0.0<br>002<br>004<br>6  | 0.0<br>004<br>218<br>8  | 0.0<br>004<br>824<br>9  | 0.0<br>005<br>076<br>8  | 0.0<br>004<br>544<br>5  | 0.0<br>005<br>036<br>5  | 0.0<br>001<br>041<br>0  |
| Betaine                                                                                                        | 0.0<br>089<br>944<br>2 | 0.0<br>043<br>721<br>1 | 0.0<br>061<br>413<br>9 | 0.0<br>068<br>776<br>8 | 0.0<br>068<br>963<br>1  | 0.0<br>098<br>295<br>4  | 0.0<br>059<br>453<br>3  | 0.0<br>064<br>977<br>6 | 0.0<br>061<br>094<br>6  | 0.0<br>059<br>764<br>9  | 0.0<br>054<br>430<br>4  | 0.0<br>049<br>704<br>1  | 0.0<br>059<br>457<br>9  | 0.0<br>050<br>331<br>9  | 0.0<br>041<br>0         |
| Bilirubin                                                                                                      | 0.0<br>010<br>267<br>2 | 0.0<br>003<br>954<br>4 | 0.0<br>002<br>632<br>7 | 0.0<br>010<br>109<br>5 | 0.0<br>002<br>785<br>9  | 0.0<br>002<br>239<br>5  | 0.0<br>004<br>628<br>5  | 0.0<br>003<br>236<br>1 | 0.0<br>002<br>872<br>1  | 0.0<br>003<br>024<br>7  | 0.0<br>002<br>575<br>3  | 0.0<br>004<br>762<br>5  | 0.0<br>002<br>514<br>1  | 0.0<br>004<br>243<br>4  | 0.0<br>003<br>804<br>4  |
| calcitroic acid                                                                                                | 0.0<br>002<br>193<br>1 | 0.0<br>002<br>424<br>6 | 0.0<br>003<br>024<br>6 | 0.0<br>003<br>461<br>9 | 0.0<br>002<br>030<br>6  | 0.0<br>002<br>614<br>6  | 0.0<br>003<br>795<br>1  | 0.0<br>001<br>065<br>8 | 0.0<br>001<br>222<br>1  | 0.0<br>001<br>172<br>8  | 0.0<br>001<br>269<br>1  | 0.0<br>001<br>061<br>2  | 0.0<br>001<br>608<br>5  | 0.0<br>001<br>487<br>2  | 0.0<br>002<br>214<br>6  |
| Choline                                                                                                        | 0.0<br>090<br>960<br>8 | 0.0<br>071<br>364<br>5 | 0.0<br>103<br>365<br>4 | 0.0<br>084<br>719<br>8 | 0.0<br>085<br>801<br>6  | 0.0<br>086<br>980<br>6  | 0.0<br>116<br>008<br>3  | 0.0<br>114<br>936<br>4 | 0.0<br>128<br>656<br>8  | 0.0<br>112<br>444<br>4  | 0.0<br>087<br>718<br>7  | 0.0<br>126<br>329<br>5  | 0.0<br>085<br>476<br>5  | 0.0<br>080<br>287<br>6  | 0.0<br>074<br>870<br>8  |
| cIMP                                                                                                           | 0.0<br>075<br>291<br>4 | 0.0<br>060<br>747<br>7 | 0.0<br>063<br>835<br>4 | 0.0<br>061<br>466<br>7 | 0.0<br>078<br>934<br>8  | 0.0<br>077<br>857<br>3  | 0.0<br>062<br>135<br>2  | 0.0<br>080<br>785<br>8 | 0.0<br>101<br>840<br>2  | 0.0<br>089<br>385<br>6  | 0.0<br>095<br>826<br>5  | 0.0<br>097<br>377<br>8  | 0.0<br>079<br>895<br>8  | 0.0<br>078<br>232<br>7  | 0.0<br>051<br>659<br>1  |
| cis-4-Decenoyl carnitine                                                                                       | 0.0<br>002<br>348<br>9 | 0.0<br>001<br>300<br>3 | 0.0<br>7E-<br>05       | 0.0<br>001<br>301<br>7 | 0.0<br>001<br>358<br>2  | 0.0<br>8E-<br>05        | 0.0<br>001<br>196<br>9  | 0.0<br>5E-<br>05       | 0.0<br>8.5<br>0E-<br>05 | 0.0<br>7.2<br>9E-<br>05 | 0.0<br>8.5<br>0E-<br>05 | 0.0<br>7.2<br>1E-<br>05 | 0.0<br>9.9<br>0E-<br>05 | 0.0<br>0.01<br>218<br>9 | 0.0<br>0.01<br>542<br>3 |
| cis-cis_9-12_octadecadienoyl_L-Carnitine                                                                       | 0.0<br>016<br>423<br>4 | 0.0<br>011<br>580<br>8 | 0.0<br>007<br>317<br>6 | 0.0<br>012<br>054<br>6 | 0.0<br>011<br>951<br>6  | 0.0<br>011<br>004<br>8  | 0.0<br>011<br>200<br>6  | 0.0<br>009<br>755<br>9 | 0.0<br>006<br>266<br>4  | 0.0<br>008<br>957<br>7  | 0.0<br>010<br>266<br>9  | 0.0<br>009<br>220<br>4  | 0.0<br>008<br>460<br>4  | 0.0<br>009<br>545<br>6  | 0.0<br>014<br>109<br>2  |
| cis,cis-tetradeca-5,8-dienoyl-CoA                                                                              | 3.6<br>5E-<br>05       | 2.7<br>4E-<br>05       | 3.5<br>0E-<br>05       | 2.8<br>3E-<br>05       | 3.3<br>4E-<br>05        | 4.3<br>1E-<br>05        | 3.0<br>6E-<br>05        | 3.5<br>0E-<br>05       | 3.0<br>3E-<br>05        | 3.5<br>6E-<br>05        | 3.7<br>2E-<br>05        | 3.6<br>6E-<br>05        | 3.7<br>7E-<br>05        | 2.4<br>5E-<br>05        | 2.4<br>5E-<br>05        |
| CITRULLINE                                                                                                     | 0.0<br>081<br>908<br>6 | 0.0<br>054<br>189<br>8 | 0.0<br>051<br>378<br>5 | 0.0<br>053<br>796<br>7 | 0.0<br>063<br>696<br>2  | 0.0<br>062<br>546<br>5  | 0.0<br>051<br>437<br>4  | 0.0<br>037<br>852<br>5 | 0.0<br>054<br>132<br>6  | 0.0<br>067<br>132<br>4  | 0.0<br>055<br>010<br>7  | 0.0<br>051<br>951<br>8  | 0.0<br>071<br>302<br>8  | 0.0<br>065<br>743<br>8  | 0.0<br>047<br>631<br>7  |
| Creatine                                                                                                       | 0.0<br>082<br>625<br>1 | 0.0<br>078<br>929<br>3 | 0.0<br>085<br>397<br>7 | 0.0<br>082<br>334<br>4 | 0.0<br>076<br>178<br>5  | 0.0<br>103<br>551<br>5  | 0.0<br>081<br>304<br>3  | 0.0<br>072<br>217<br>9 | 0.0<br>050<br>134<br>7  | 0.0<br>079<br>140<br>9  | 0.0<br>054<br>428<br>9  | 0.0<br>058<br>782<br>4  | 0.0<br>072<br>6<br>6    | 0.0<br>058<br>071<br>0  | 0.0<br>071<br>768<br>0  |
| Creatinine                                                                                                     | 0.0<br>028             | 0.0<br>023             | 0.0<br>025             | 0.0<br>024             | 0.0<br>022              | 0.0<br>026              | 0.0<br>030              | 0.0<br>026             | 0.0<br>020              | 0.0<br>024              | 0.0<br>020              | 0.0<br>025              | 0.0<br>024              | 0.0<br>018              | 0.0<br>020              |

|                                |                        |                        |                        |                        |                        |                        |                        |                        |                        |                        |                         |                        |                        |                        |                        |
|--------------------------------|------------------------|------------------------|------------------------|------------------------|------------------------|------------------------|------------------------|------------------------|------------------------|------------------------|-------------------------|------------------------|------------------------|------------------------|------------------------|
|                                | 363<br>2               | 600<br>1               | 328<br>9               | 373<br>7               | 103<br>6               | 307<br>2               | 065<br>4               | 067<br>9               | 270<br>1               | 787<br>4               | 784<br>6                | 828<br>2               | 037<br>4               | 577<br>9               | 634<br>4               |
| Cyclopentadecanolide           | 0.0<br>002<br>495<br>9 | 0.0<br>001<br>987<br>5 | 0.0<br>001<br>496<br>2 | 0.0<br>001<br>499<br>4 | 0.0<br>001<br>3<br>3   | 0.0<br>001<br>323<br>9 | 0.0<br>002<br>107<br>9 | 0.0<br>001<br>570<br>5 | 0.0<br>001<br>425<br>9 | 0.0<br>001<br>221<br>9 | 0.0<br>001<br>106<br>9  | 0.0<br>001<br>077<br>1 | 0.0<br>001<br>696<br>4 | 0.0<br>001<br>880<br>7 | 0.0<br>002<br>694<br>9 |
| Cystine                        | 0.0<br>006<br>918<br>5 | 0.0<br>013<br>834<br>7 | 0.0<br>011<br>623<br>2 | 0.0<br>007<br>298<br>6 | 0.0<br>006<br>860<br>6 | 0.0<br>014<br>484<br>8 | 0.0<br>006<br>090<br>6 | 0.0<br>012<br>626<br>2 | 0.0<br>014<br>408<br>3 | 0.0<br>012<br>647<br>2 | 0.0<br>012<br>920<br>5  | 0.0<br>013<br>388<br>7 | 0.0<br>014<br>874<br>3 | 0.0<br>016<br>297<br>6 | 0.0<br>009<br>101<br>1 |
| D-Malic acid                   | 0.0<br>025<br>938<br>3 | 0.0<br>018<br>219<br>4 | 0.0<br>009<br>594<br>7 | 0.0<br>013<br>664<br>4 | 0.0<br>021<br>862<br>6 | 0.0<br>014<br>278<br>6 | 0.0<br>021<br>292<br>7 | 0.0<br>018<br>893<br>6 | 0.0<br>005<br>251<br>8 | 0.0<br>015<br>855<br>6 | 0.0<br>006<br>073<br>2  | 0.0<br>014<br>590<br>5 | 0.0<br>015<br>172<br>5 | 0.0<br>017<br>104<br>7 | 0.0<br>012<br>567<br>4 |
| D-Sedoheptulose                | 4.9<br>2E-<br>05       | 0.0<br>001<br>023<br>2 | 8.1<br>4E-<br>05       | 6.6<br>0E-<br>05       | 5.1<br>8E-<br>05       | 8.8<br>2E-<br>05       | 5.9<br>6E-<br>05       | 0.0<br>001<br>065<br>2 | 0.0<br>001<br>036<br>1 | 9.5<br>1E-<br>05       | 9.2<br>1E-<br>05        | 7.9<br>5E-<br>05       | 8.1<br>3E-<br>05       | 9.4<br>1E-<br>05       | 7.0<br>5E-<br>05       |
| D-Tryptophan                   | 0.0<br>045<br>701<br>7 | 0.0<br>072<br>325<br>6 | 0.0<br>056<br>995<br>9 | 0.0<br>061<br>245<br>6 | 0.0<br>058<br>410<br>6 | 0.0<br>070<br>011<br>8 | 0.0<br>055<br>233<br>9 | 0.0<br>064<br>304<br>3 | 0.0<br>048<br>153<br>9 | 0.0<br>069<br>608<br>9 | 0.0<br>093<br>361<br>5  | 0.0<br>072<br>451<br>5 | 0.0<br>060<br>077<br>3 | 0.0<br>052<br>026<br>8 | 0.0<br>045<br>109<br>2 |
| Decanoylcarnitine              | 8.7<br>3E-<br>05       | 6.6<br>7E-<br>05       | 4.9<br>9E-<br>05       | 8.1<br>5E-<br>05       | 7.2<br>5E-<br>05       | 4.4<br>0E-<br>05       | 5.7<br>2E-<br>05       | 4.8<br>8E-<br>05       | 3.3<br>2E-<br>05       | 6.7<br>1E-<br>05       | 5.6<br>3E-<br>05        | 4.6<br>1E-<br>05       | 6.1<br>2E-<br>05       | 7.9<br>2E-<br>05       | 0.0<br>001<br>337<br>7 |
| Dehydroepiandrosterone sulfate | 5.7<br>6E-<br>06       | 6.7<br>2E-<br>06       | 7.5<br>3E-<br>06       | 6.7<br>3E-<br>06       | 7.4<br>3E-<br>06       | 6.8<br>4E-<br>06       | 8.5<br>7E-<br>06       | 8.9<br>3E-<br>06       | 6.7<br>1E-<br>06       | 7.2<br>6E-<br>06       | 6.9<br>3E-<br>06        | 6.8<br>1E-<br>06       | 6.3<br>0E-<br>06       | 7.2<br>0E-<br>06       | 6.9<br>7E-<br>06       |
| Deoxycarnitine                 | 0.0<br>002<br>946<br>2 | 0.0<br>002<br>253<br>3 | 0.0<br>002<br>468<br>6 | 0.0<br>002<br>581<br>3 | 0.0<br>003<br>731<br>8 | 0.0<br>002<br>306<br>9 | 0.0<br>003<br>431<br>5 | 0.0<br>002<br>068<br>3 | 7.4<br>4E-<br>05       | 0.0<br>002<br>239<br>8 | 0.0<br>002<br>181<br>9  | 0.0<br>001<br>359<br>9 | 0.0<br>002<br>204<br>9 | 0.0<br>002<br>054<br>1 | 0.0<br>001<br>857<br>4 |
| Diginatigenin                  | 0.0<br>002<br>355<br>5 | 0.0<br>002<br>577<br>2 | 7.9<br>5E-<br>05       | 0.0<br>002<br>109<br>4 | 0.0<br>002<br>190<br>7 | 0.0<br>002<br>933<br>7 | 1.2<br>6E-<br>05       | 0.0<br>001<br>720<br>5 | 3.5<br>9E-<br>05       | 0.0<br>002<br>359<br>6 | 0.0<br>002<br>389<br>2  | 0.0<br>002<br>005<br>2 | 0.0<br>001<br>360<br>2 | 0.0<br>001<br>749<br>2 | 8.6<br>3E-<br>05       |
| Diisopropylphosphate           | 0.0<br>876<br>2        | 0.0<br>547<br>4        | 0.0<br>002<br>670<br>3 | 0.0<br>002<br>523<br>6 | 0.0<br>002<br>200<br>1 | 0.0<br>002<br>427<br>5 | 0.0<br>002<br>448<br>8 | 0.0<br>001<br>427<br>6 | 0.0<br>001<br>718<br>9 | 0.0<br>001<br>792<br>9 | 0.0<br>001<br>995<br>7  | 0.0<br>002<br>083<br>7 | 0.0<br>001<br>909<br>2 | 0.0<br>002<br>035<br>9 | 0.0<br>002<br>178<br>9 |
| DL-Leucine                     | 0.0<br>221<br>275<br>6 | 0.0<br>263<br>194<br>9 | 0.0<br>399<br>177<br>9 | 0.0<br>343<br>623<br>7 | 0.0<br>272<br>898<br>1 | 0.0<br>427<br>775<br>4 | 0.0<br>293<br>985<br>1 | 0.0<br>377<br>597<br>7 | 0.0<br>351<br>597<br>5 | 0.0<br>362<br>939<br>8 | 0.0<br>408<br>534<br>5  | 0.0<br>361<br>395<br>5 | 0.0<br>370<br>155<br>1 | 0.0<br>333<br>815<br>3 | 0.0<br>383<br>950<br>3 |
| docosaheptaenoic acid          | 6.3<br>4E-<br>05       | 6.2<br>8E-<br>05       | 8.0<br>4E-<br>05       | 7.6<br>2E-<br>05       | 7.6<br>4E-<br>05       | 4.8<br>2E-<br>05       | 0.0<br>001<br>078<br>9 | 5.5<br>4E-<br>05       | 5.0<br>7E-<br>05       | 4.5<br>6E-<br>05       | 4.4<br>7E-<br>05        | 3.6<br>8E-<br>05       | 4.4<br>7E-<br>05       | 5.0<br>3E-<br>05       | 7.8<br>4E-<br>05       |
| DOCOSAHEXAENOIC ACID           | 0.0<br>174<br>708<br>3 | 0.0<br>167<br>368<br>1 | 0.0<br>211<br>654<br>6 | 0.0<br>211<br>712<br>3 | 0.0<br>206<br>984<br>9 | 0.0<br>156<br>317<br>3 | 0.0<br>256<br>056<br>4 | 0.0<br>183<br>338<br>9 | 0.0<br>124<br>571<br>8 | 0.0<br>123<br>781<br>6 | 0.0<br>100<br>479<br>6  | 0.0<br>099<br>479<br>5 | 0.0<br>138<br>602<br>6 | 0.0<br>141<br>338<br>3 | 0.0<br>181<br>196<br>1 |
| Docosanoic acid                | 5.8<br>7E-<br>05       | 4.7<br>5E-<br>05       | 4.1<br>9E-<br>05       | 5.0<br>0E-<br>05       | 5.0<br>6E-<br>05       | 5.9<br>3E-<br>05       | 5.4<br>0E-<br>05       | 4.7<br>5E-<br>05       | 3.2<br>6E-<br>05       | 4.4<br>5E-<br>05       | 4.5<br>3E-<br>05        | 3.2<br>9E-<br>05       | 8.2<br>1E-<br>05       | 4.8<br>6E-<br>05       | 4.3<br>1E-<br>05       |
| Docosapentaenoic acid          | 0.0<br>027<br>470<br>4 | 0.0<br>026<br>342<br>9 | 0.0<br>035<br>950<br>9 | 0.0<br>035<br>171<br>2 | 0.0<br>037<br>516<br>7 | 0.0<br>032<br>269<br>1 | 0.0<br>036<br>693<br>7 | 0.0<br>030<br>704<br>5 | 0.0<br>018<br>693<br>2 | 0.0<br>021<br>337<br>6 | 0.0<br>017<br>075<br>2  | 0.0<br>018<br>075<br>7 | 0.0<br>018<br>967<br>5 | 0.0<br>022<br>217<br>1 | 0.0<br>032<br>917<br>6 |
| Docosatetraenoic acid          | 0.0<br>008<br>219<br>9 | 0.0<br>006<br>698<br>2 | 0.0<br>006<br>297<br>9 | 0.0<br>007<br>611<br>3 | 0.0<br>009<br>139<br>4 | 0.0<br>007<br>117<br>5 | 0.0<br>009<br>245<br>8 | 0.0<br>005<br>362<br>1 | 0.0<br>004<br>947<br>4 | 0.0<br>004<br>903<br>5 | 0.0<br>003<br>012<br>4  | 0.0<br>004<br>012<br>7 | 0.0<br>004<br>327<br>9 | 0.0<br>005<br>005<br>5 | 0.0<br>006<br>928<br>5 |
| Docosatrenoic acid             | 5.1<br>5E-<br>05       | 4.5<br>8E-<br>05       | 4.6<br>7E-<br>05       | 4.8<br>8E-<br>05       | 5.9<br>7E-<br>05       | 4.4<br>5E-<br>05       | 5.9<br>2E-<br>05       | 4.0<br>4E-<br>05       | 3.1<br>6E-<br>05       | 3.2<br>9E-<br>05       | 3.3<br>2E-<br>05        | 3.0<br>4E-<br>05       | 3.4<br>1E-<br>05       | 4.1<br>6E-<br>05       | 4.5<br>9E-<br>05       |
| Eicosadienoic acid             | 0.0<br>011<br>867<br>7 | 0.0<br>011<br>08<br>2  | 0.0<br>011<br>032<br>2 | 0.0<br>011<br>460<br>2 | 0.0<br>011<br>894<br>4 | 0.0<br>008<br>808<br>6 | 0.0<br>013<br>526<br>6 | 0.0<br>010<br>148<br>3 | 0.0<br>008<br>484<br>9 | 0.0<br>007<br>780<br>4 | 0.0<br>007<br>828<br>4  | 0.0<br>006<br>075<br>6 | 0.0<br>007<br>543<br>6 | 0.0<br>009<br>400<br>2 | 0.0<br>012<br>126<br>2 |
| Eicosapentaenoic acid          | 0.0<br>028<br>906<br>6 | 0.0<br>043<br>538<br>7 | 0.0<br>044<br>155<br>9 | 0.0<br>040<br>025<br>3 | 0.0<br>031<br>710<br>9 | 0.0<br>032<br>538<br>9 | 0.0<br>035<br>763<br>8 | 0.0<br>041<br>594<br>1 | 0.0<br>020<br>081<br>4 | 0.0<br>022<br>887<br>6 | 0.0<br>021<br>653<br>9  | 0.0<br>021<br>653<br>3 | 0.0<br>029<br>759<br>1 | 0.0<br>033<br>795<br>6 | 0.0<br>048<br>734<br>2 |
| Eicosatrienoic acid            | 0.0<br>020<br>411<br>7 | 0.0<br>019<br>180<br>6 | 0.0<br>017<br>575<br>9 | 0.0<br>018<br>265<br>6 | 0.0<br>018<br>009<br>6 | 0.0<br>014<br>892<br>3 | 0.0<br>025<br>252<br>1 | 0.0<br>016<br>64<br>1  | 0.0<br>012<br>015<br>4 | 0.0<br>012<br>213<br>5 | 0.0<br>011<br>603<br>7  | 0.0<br>009<br>594<br>7 | 0.0<br>012<br>949<br>4 | 0.0<br>016<br>380<br>7 | 0.0<br>018<br>392<br>4 |
| Eicosenoic acid                | 0.0<br>026<br>681<br>1 | 0.0<br>025<br>563<br>5 | 0.0<br>020<br>181<br>4 | 0.0<br>025<br>087<br>2 | 0.0<br>020<br>126<br>9 | 0.0<br>020<br>018<br>9 | 0.0<br>026<br>266<br>3 | 0.0<br>026<br>732<br>6 | 0.0<br>022<br>076<br>1 | 0.0<br>016<br>606<br>2 | 0.0<br>017<br>294<br>8  | 0.0<br>015<br>979<br>7 | 0.0<br>023<br>74<br>7  | 0.0<br>028<br>877<br>7 | 0.0<br>035<br>328<br>5 |
| ELAIDIC ACID                   | 0.0<br>648<br>163<br>2 | 0.0<br>583<br>941<br>1 | 0.0<br>564<br>511<br>8 | 0.0<br>554<br>759<br>8 | 0.0<br>522<br>8<br>2   | 0.0<br>488<br>084<br>2 | 0.0<br>614<br>957<br>3 | 0.0<br>573<br>491<br>1 | 0.0<br>494<br>449<br>3 | 0.0<br>444<br>300<br>7 | 0.0<br>451<br>810<br>2  | 0.0<br>415<br>276<br>7 | 0.0<br>454<br>384<br>7 | 0.0<br>466<br>681<br>7 | 0.0<br>589<br>305<br>1 |
| Erucamide                      | 7.0<br>4E-<br>05       | 0.0<br>001<br>265<br>1 | 0.0<br>001<br>312<br>7 | 9.2<br>4E-<br>05       | 8.4<br>9E-<br>05       | 0.0<br>001<br>286<br>7 | 0.0<br>001<br>084<br>9 | 0.0<br>0.0<br>327<br>9 | 5.9<br>5E-<br>05       | 0.0<br>001<br>161<br>3 | 0.0<br>0.0<br>152<br>4  | 9.0<br>0E-<br>05       | 7.4<br>3E-<br>05       | 6.6<br>6E-<br>05       | 7.7<br>6E-<br>05       |
| Erucic acid                    | 0.0<br>001<br>629<br>3 | 0.0<br>002<br>115<br>9 | 0.0<br>001<br>866<br>2 | 0.0<br>002<br>109<br>2 | 0.0<br>001<br>639<br>9 | 0.0<br>002<br>663<br>9 | 0.0<br>001<br>240<br>3 | 0.0<br>001<br>930<br>5 | 0.0<br>001<br>227<br>5 | 0.0<br>001<br>77<br>7  | 0.0<br>001<br>574<br>2  | 0.0<br>001<br>354<br>4 | 0.0<br>002<br>127<br>2 | 0.0<br>002<br>728<br>4 | 0.0<br>002<br>517<br>7 |
| Gluconate                      | 0.0<br>003<br>613<br>9 | 0.0<br>004<br>821<br>5 | 0.0<br>004<br>921<br>6 | 0.0<br>003<br>937<br>7 | 0.0<br>003<br>737<br>9 | 0.0<br>004<br>677<br>9 | 0.0<br>004<br>037<br>5 | 0.0<br>005<br>602<br>2 | 0.0<br>005<br>757<br>2 | 0.0<br>005<br>538<br>7 | 0.0<br>004<br>013<br>12 | 0.0<br>006<br>013<br>8 | 0.0<br>006<br>006<br>8 | 0.0<br>006<br>596<br>7 | 0.0<br>008<br>400<br>5 |

|                                       |                        |                         |                        |                        |                        |                         |                               |                        |                        |                          |                          |                        |                        |                         |                        |
|---------------------------------------|------------------------|-------------------------|------------------------|------------------------|------------------------|-------------------------|-------------------------------|------------------------|------------------------|--------------------------|--------------------------|------------------------|------------------------|-------------------------|------------------------|
| Glucose                               | 0.0<br>008<br>781<br>6 | 0.0<br>013<br>150<br>3  | 0.0<br>011<br>396<br>5 | 0.0<br>012<br>959      | 0.0<br>012<br>660<br>1 | 0.0<br>013<br>160<br>1  | 0.0<br>009<br>732<br>3        | 0.0<br>018<br>040<br>1 | 0.0<br>008<br>198<br>5 | 0.0<br>013<br>762<br>9   | 0.0<br>011<br>782<br>2   | 0.0<br>012<br>804<br>2 | 0.0<br>008<br>491<br>6 | 0.0<br>010<br>538<br>3  | 0.0<br>007<br>109<br>6 |
| Glutamic acid                         | 0.0<br>003<br>347<br>3 | 0.0<br>002<br>694<br>9  | 0.0<br>003<br>925<br>2 | 0.0<br>002<br>776<br>4 | 0.0<br>002<br>935<br>4 | 0.0<br>001<br>827<br>1  | 0.0<br>004<br>878<br>8        | 0.0<br>002<br>253<br>1 | 0.0<br>008<br>172<br>8 | 0.0<br>003<br>940<br>8   | 0.0<br>006<br>938<br>1   | 0.0<br>006<br>395<br>3 | 0.0<br>006<br>741<br>5 | 0.0<br>004<br>172<br>3  | 0.0<br>002<br>921<br>3 |
| GLUTAMINE                             | 0.0<br>430<br>496<br>3 | 0.0<br>393<br>625<br>9  | 0.0<br>329<br>525<br>2 | 0.0<br>331<br>525<br>9 | 0.0<br>369<br>580<br>2 | 0.0<br>373<br>580<br>5  | 0.0<br>321<br>278<br>1        | 0.0<br>310<br>948<br>2 | 0.0<br>525<br>441<br>2 | 0.0<br>545<br>986<br>2   | 0.0<br>479<br>907<br>8   | 0.0<br>389<br>907<br>7 | 0.0<br>554<br>822<br>1 | 0.0<br>546<br>429<br>3  | 0.0<br>413<br>662<br>8 |
| Glycol distearate                     | 5.0<br>6E-<br>05       | 4.1<br>8E-<br>05        | 2.0<br>7E-<br>05       | 3.6<br>2E-<br>05       | 2.8<br>2E-<br>05       | 2.1<br>3E-<br>05        | 3.8<br>1E-<br>05              | 4.0<br>2E-<br>05       | 3.0<br>5E-<br>05       | 2.9<br>6E-<br>05         | 1.9<br>5E-<br>05         | 1.5<br>1E-<br>05       | 4.5<br>3E-<br>05       | 5.3<br>5E-<br>05        | 6.0<br>8E-<br>05       |
| Heneicosylic acid                     | 1.5<br>9E-<br>05       | 2.4<br>7E-<br>05        | 1.7<br>9E-<br>05       | 2.4<br>3E-<br>05       | 1.6<br>3E-<br>05       | 3.2<br>1E-<br>05        | 2.2<br>8E-<br>05              | 1.8<br>7E-<br>05       | 9.6<br>1E-<br>06       | 2.1<br>3E-<br>05         | 1.6<br>1E-<br>05         | 7.8<br>0E-<br>06       | 2.6<br>8E-<br>05       | 2.9<br>5E-<br>05        | 2.5<br>1E-<br>05       |
| Hippurate                             | 3.8<br>8E-<br>05       | 3.4<br>7E-<br>05        | 5.7<br>7E-<br>05       | 4.4<br>5E-<br>05       | 4.0<br>7E-<br>05       | 2.4<br>7E-<br>05        | 2.9<br>8E-<br>05              | 2.1<br>9E-<br>05       | 4.8<br>7E-<br>06       | 5.6<br>2E-<br>06         | 5.7<br>9E-<br>06         | 6.2<br>4E-<br>06       | 4.4<br>0E-<br>05       | 4.6<br>0E-<br>05        | 3.8<br>5E-<br>05       |
| Histamine                             | 0.0<br>001<br>319<br>3 | 0.0<br>001<br>724<br>05 | 0.0<br>7E-<br>05       | 0.0<br>001<br>708<br>9 | 0.0<br>001<br>885<br>8 | 0.0<br>001<br>524<br>05 | 3.0<br>0E-<br>05              | 7.5<br>6E-<br>05       | 0.0<br>002<br>747<br>3 | 0.0<br>001<br>658<br>9   | 0.0<br>002<br>001<br>2   | 0.0<br>001<br>517<br>8 | 0.0<br>001<br>503<br>6 | 0.0<br>001<br>3E-<br>05 | 7.0<br>05              |
| Histidine                             | 0.0<br>225<br>560<br>2 | 0.0<br>150<br>520<br>6  | 0.0<br>148<br>509<br>4 | 0.0<br>179<br>895<br>1 | 0.0<br>217<br>997<br>1 | 0.0<br>163<br>214<br>4  | 0.0<br>138<br>182<br>3        | 0.0<br>103<br>126<br>8 | 0.0<br>163<br>646<br>4 | 0.0<br>169<br>372<br>3   | 0.0<br>214<br>334<br>9   | 0.0<br>124<br>973<br>9 | 0.0<br>160<br>713<br>9 | 0.0<br>168<br>364<br>4  | 0.0<br>142<br>364<br>4 |
| hydroxycitric acid                    | 0.0<br>002<br>476<br>9 | 0.0<br>005<br>585<br>3  | 0.0<br>005<br>070<br>9 | 0.0<br>004<br>236<br>8 | 0.0<br>002<br>166<br>2 | 0.0<br>004<br>166<br>5  | 0.0<br>003<br>346<br>7        | 0.0<br>005<br>345<br>2 | 0.0<br>002<br>690<br>2 | 0.0<br>004<br>349<br>7   | 0.0<br>002<br>976<br>6   | 0.0<br>004<br>258<br>9 | 0.0<br>003<br>468<br>2 | 0.0<br>004<br>062<br>5  | 0.0<br>003<br>735<br>8 |
| INDOLE                                | 0.0<br>002<br>030<br>2 | 0.0<br>001<br>746<br>9  | 0.0<br>002<br>327<br>1 | 0.0<br>001<br>778<br>9 | 0.0<br>001<br>551<br>6 | 0.0<br>001<br>760<br>1  | 0.0<br>002<br>343<br>5        | 0.0<br>001<br>328<br>2 | 0.0<br>001<br>180<br>6 | 0.0<br>001<br>210<br>6   | 0.0<br>001<br>518<br>4   | 0.0<br>001<br>178<br>9 | 0.0<br>001<br>267<br>9 | 0.0<br>001<br>295<br>7  | 0.0<br>001<br>776<br>6 |
| INDOXYL SULFATE                       | 0.0<br>005<br>251<br>6 | 0.0<br>007<br>101<br>2  | 0.0<br>012<br>307<br>4 | 0.0<br>012<br>075<br>1 | 0.0<br>007<br>342<br>7 | 0.0<br>015<br>805<br>9  | 0.0<br>006<br>101<br>8        | 0.0<br>007<br>426<br>1 | 0.0<br>005<br>616<br>8 | 0.0<br>009<br>018<br>2   | 0.0<br>003<br>363<br>3   | 0.0<br>003<br>882<br>9 | 0.0<br>012<br>697<br>7 | 0.0<br>006<br>708<br>9  | 0.0<br>010<br>794<br>7 |
| Isophthalic acid                      | 1.0<br>6E-<br>05       | 1.2<br>6E-<br>05        | 1.3<br>3E-<br>05       | 1.2<br>3E-<br>05       | 1.2<br>3E-<br>05       | 1.2<br>7E-<br>05        | 1.3<br>6E-<br>05              | 1.3<br>4E-<br>05       | 1.0<br>4E-<br>05       | 1.1<br>5E-<br>05         | 1.1<br>5E-<br>05         | 1.2<br>6E-<br>05       | 1.1<br>3E-<br>05       | 1.0<br>6E-<br>05        | 1.0<br>8E-<br>05       |
| Itaconic acid                         | 0.0<br>003<br>272<br>5 | 0.0<br>003<br>296<br>9  | 0.0<br>003<br>208<br>4 | 0.0<br>002<br>368<br>4 | 0.0<br>003<br>059<br>6 | 0.0<br>003<br>683<br>9  | 0.0<br>003<br>731<br>8        | 0.0<br>003<br>578<br>8 | 0.0<br>003<br>317<br>8 | 0.0<br>003<br>545<br>8   | 0.0<br>003<br>826<br>8   | 0.0<br>004<br>055<br>8 | 0.0<br>004<br>910<br>8 | 0.0<br>003<br>953<br>7  | 0.0<br>004<br>506<br>5 |
| L-(+) Lactic acid                     | 0.0<br>127<br>544<br>5 | 0.0<br>092<br>109<br>1  | 0.0<br>112<br>845<br>6 | 0.0<br>125<br>362<br>7 | 0.0<br>105<br>910<br>3 | 0.0<br>188<br>098<br>1  | 0.0<br>181<br>696<br>9        | 0.0<br>110<br>294<br>2 | 0.0<br>121<br>966<br>1 | 0.0<br>093<br>834<br>2   | 0.0<br>122<br>670<br>8   | 0.0<br>161<br>404<br>8 | 0.0<br>131<br>099<br>7 | 0.0<br>030<br>047<br>7  | 0.0<br>138<br>196<br>1 |
| L-alpha-Glycerolphosphorylcholine     | 0.0<br>007<br>438      | 0.0<br>013<br>875<br>7  | 0.0<br>014<br>829<br>7 | 0.0<br>012<br>297<br>9 | 0.0<br>008<br>962<br>6 | 0.0<br>011<br>070<br>6  | 0.0<br>013<br>153<br>7        | 0.0<br>010<br>260<br>8 | 0.0<br>005<br>523<br>8 | 0.0<br>015<br>393<br>2   | 0.0<br>016<br>128<br>3   | 0.0<br>011<br>814<br>6 | 0.0<br>014<br>527<br>9 | 0.0<br>014<br>694<br>9  | 0.0<br>011<br>271<br>3 |
| L-alpha-lysophosphatidylcholine       | 0.0<br>001<br>226<br>6 | 9.1<br>3E-<br>05        | 0.0<br>001<br>338<br>8 | 0.0<br>001<br>437<br>4 | 0.0<br>001<br>499<br>5 | 0.0<br>001<br>422<br>7  | 0.0<br>002<br>011<br>193<br>6 | 8.0<br>4E-<br>05       | 9.8<br>9E-<br>05       | 0.0<br>001<br>011<br>168 | 0.0<br>001<br>011<br>168 | 9.7<br>0E-<br>05       | 0.0<br>001<br>073<br>7 | 9.8<br>3E-<br>05        | 0.0<br>001<br>073<br>7 |
| L-Arginine                            | 0.0<br>106<br>298<br>4 | 0.0<br>081<br>832<br>5  | 0.0<br>073<br>754<br>9 | 0.0<br>084<br>381<br>8 | 0.0<br>117<br>710<br>4 | 0.0<br>089<br>540<br>1  | 0.0<br>070<br>706<br>1        | 0.0<br>066<br>142<br>6 | 0.0<br>107<br>467<br>1 | 0.0<br>147<br>893<br>7   | 0.0<br>108<br>297<br>9   | 0.0<br>087<br>226<br>6 | 0.0<br>108<br>178<br>9 | 0.0<br>067<br>970<br>9  | 0.0<br>067<br>970<br>9 |
| L-CARNITINE                           | 0.0<br>001<br>075      | 0.0<br>001<br>100<br>7  | 0.0<br>001<br>001<br>5 | 0.0<br>001<br>001<br>4 | 0.0<br>001<br>001<br>5 | 0.0<br>002<br>001<br>3  | 0.0<br>002<br>001<br>2        | 0.0<br>001<br>001<br>4 | 7.8<br>4E-<br>05       | 0.0<br>001<br>175<br>3   | 6.5<br>8E-<br>05         | 8.1<br>0E-<br>05       | 8.8<br>2E-<br>05       | 8.6<br>5E-<br>05        | 6.9<br>5E-<br>05       |
| L-Cysteinyglycine disulfide           | 6.0<br>0E-<br>05       | 9.0<br>8E-<br>05        | 8.5<br>2E-<br>05       | 8.3<br>6E-<br>05       | 7.3<br>3E-<br>05       | 8.3<br>1E-<br>05        | 0.0<br>001<br>149             | 0.0<br>001<br>018<br>3 | 8.6<br>4E-<br>05       | 6.3<br>8E-<br>05         | 6.2<br>3E-<br>05         | 8.8<br>9E-<br>05       | 7.9<br>0E-<br>05       | 6.1<br>7E-<br>05        | 8.8<br>4E-<br>05       |
| L-Kynurenine                          | 8.6<br>8E-<br>05       | 0.0<br>001<br>025<br>5  | 7.8<br>1E-<br>05       | 6.7<br>0E-<br>05       | 8.1<br>5E-<br>05       | 9.6<br>2E-<br>05        | 8.0<br>0E-<br>05              | 8.2<br>5E-<br>05       | 4.2<br>4E-<br>05       | 8.8<br>8E-<br>05         | 8.1<br>0E-<br>05         | 8.6<br>9E-<br>05       | 7.7<br>9E-<br>05       | 8.0<br>5E-<br>05        | 5.4<br>0E-<br>05       |
| L-Lysine                              | 0.0<br>095<br>369<br>2 | 0.0<br>058<br>517<br>3  | 0.0<br>058<br>456      | 0.0<br>059<br>821<br>2 | 0.0<br>001<br>517<br>7 | 0.0<br>077<br>210<br>9  | 0.0<br>048<br>048<br>6        | 0.0<br>049<br>093<br>4 | 0.0<br>131<br>485<br>9 | 0.0<br>104<br>712<br>3   | 0.0<br>097<br>208<br>3   | 0.0<br>097<br>366      | 0.0<br>070<br>130<br>9 | 0.0<br>092<br>460<br>6  | 0.0<br>053<br>235<br>1 |
| L-Pipecolic acid                      | 0.0<br>035<br>282<br>1 | 0.0<br>022<br>002<br>7  | 0.0<br>021<br>775<br>3 | 0.0<br>022<br>236<br>2 | 0.0<br>038<br>114<br>6 | 0.0<br>028<br>289<br>2  | 0.0<br>018<br>119<br>8        | 0.0<br>018<br>222<br>3 | 0.0<br>049<br>393<br>9 | 0.0<br>051<br>988<br>7   | 0.0<br>037<br>102<br>7   | 0.0<br>026<br>864<br>3 | 0.0<br>035<br>250<br>4 | 0.0<br>019<br>338<br>9  | 0.0<br>019<br>338<br>9 |
| L-Pyroglutamic acid                   | 0.0<br>255<br>234<br>4 | 0.0<br>230<br>384<br>2  | 0.0<br>189<br>486<br>1 | 0.0<br>196<br>993<br>6 | 0.0<br>217<br>051<br>8 | 0.0<br>182<br>217<br>2  | 0.0<br>848<br>512<br>1        | 0.0<br>178<br>177<br>1 | 0.0<br>317<br>512<br>5 | 0.0<br>339<br>752<br>2   | 0.0<br>290<br>163<br>8   | 0.0<br>232<br>507<br>3 | 0.0<br>331<br>553<br>3 | 0.0<br>037<br>553<br>8  | 0.0<br>242<br>701<br>8 |
| L-Threonine acid                      | 0.0<br>007<br>289<br>1 | 0.0<br>013<br>940<br>6  | 0.0<br>014<br>061<br>1 | 0.0<br>011<br>512<br>6 | 0.0<br>008<br>246<br>7 | 0.0<br>011<br>169<br>6  | 0.0<br>010<br>246<br>3        | 0.0<br>013<br>710<br>5 | 0.0<br>007<br>750<br>7 | 0.0<br>011<br>905<br>6   | 0.0<br>008<br>582<br>6   | 0.0<br>012<br>654<br>2 | 0.0<br>010<br>510<br>6 | 0.0<br>010<br>880<br>8  | 0.0<br>010<br>880<br>8 |
| Labdanolic acid                       | 8.6<br>7E-<br>06       | 4.8<br>4E-<br>06        | 6.2<br>5E-<br>06       | 5.6<br>0E-<br>06       | 7.5<br>2E-<br>06       | 5.6<br>4E-<br>06        | 1.1<br>3E-<br>05              | 5.3<br>1E-<br>06       | 6.6<br>4E-<br>06       | 5.1<br>7E-<br>06         | 2.0<br>6E-<br>06         | 6.6<br>9E-<br>06       | 5.3<br>4E-<br>06       | 5.4<br>2E-<br>06        | 6.7<br>5E-<br>06       |
| LAURIC ACID (Dodecanoic acid, Plasma) | 0.0<br>004<br>552<br>5 | 0.0<br>002<br>961<br>9  | 0.0<br>002<br>766<br>4 | 0.0<br>003<br>128<br>8 | 0.0<br>002<br>960<br>9 | 0.0<br>001<br>999<br>1  | 0.0<br>004<br>005<br>5        | 0.0<br>003<br>489<br>9 | 0.0<br>002<br>527<br>3 | 0.0<br>000<br>180<br>3   | 0.0<br>000<br>371<br>1   | 0.0<br>000<br>750<br>8 | 0.0<br>002<br>913<br>5 | 0.0<br>000<br>172<br>7  | 0.0<br>004<br>883<br>9 |

|                                                                                 |                        |                        |                        |                        |                        |                        |                        |                         |                        |                        |                        |                        |                        |                        |                        |
|---------------------------------------------------------------------------------|------------------------|------------------------|------------------------|------------------------|------------------------|------------------------|------------------------|-------------------------|------------------------|------------------------|------------------------|------------------------|------------------------|------------------------|------------------------|
| lentiginosine                                                                   | 0.0<br>003<br>653<br>9 | 0.0<br>001<br>363<br>8 | 0.0<br>001<br>858<br>9 | 0.0<br>002<br>290<br>1 | 0.0<br>002<br>870<br>1 | 0.0<br>002<br>521<br>7 | 0.0<br>003<br>625<br>5 | 0.0<br>001<br>221<br>4  | 9.8<br>1E-<br>05       | 0.0<br>001<br>353<br>3 | 0.0<br>001<br>080<br>5 | 6.9<br>1E-<br>05       | 0.0<br>001<br>549<br>3 | 0.0<br>001<br>261<br>2 | 9.5<br>3E-<br>05       |
| LEUCINE                                                                         | 0.0<br>009<br>048<br>3 | 0.0<br>012<br>228<br>6 | 0.0<br>020<br>892<br>4 | 0.0<br>015<br>247<br>2 | 0.0<br>011<br>646<br>1 | 0.0<br>017<br>546<br>6 | 0.0<br>013<br>770<br>8 | 0.0<br>017<br>303<br>5  | 0.0<br>011<br>584<br>5 | 0.0<br>012<br>392<br>4 | 0.0<br>013<br>127<br>7 | 0.0<br>011<br>538<br>7 | 0.0<br>013<br>177<br>5 | 0.0<br>012<br>592<br>8 | 0.0<br>017<br>130<br>8 |
| Linolenic acid                                                                  | 0.0<br>002<br>854<br>2 | 0.0<br>001<br>325<br>4 | 9.7<br>0E-<br>05       | 0.0<br>001<br>305<br>8 | 0.0<br>001<br>347<br>7 | 6.1<br>4E-<br>05       | 0.0<br>001<br>464<br>8 | 9.2<br>4E-<br>05        | 0.0<br>001<br>139<br>1 | 9.3<br>1E-<br>05       | 9.4<br>0E-<br>05       | 0.0<br>001<br>148<br>4 | 9.6<br>1E-<br>05       | 0.0<br>001<br>054<br>7 | 0.0<br>001<br>733<br>9 |
| Lysolecithin                                                                    | 0.0<br>202<br>708<br>8 | 0.0<br>264<br>86<br>1  | 0.0<br>280<br>157<br>5 | 0.0<br>270<br>233<br>3 | 0.0<br>233<br>275<br>7 | 0.0<br>275<br>027<br>3 | 0.0<br>253<br>711<br>6 | 0.0<br>286<br>869<br>4  | 0.0<br>235<br>379<br>3 | 0.0<br>230<br>784<br>1 | 0.0<br>267<br>218<br>6 | 0.0<br>315<br>328<br>4 | 0.0<br>233<br>753<br>1 | 0.0<br>235<br>931<br>0 | 0.0<br>212<br>665<br>9 |
| lysoPC a C28:0                                                                  | 0.0<br>001<br>645<br>6 | 0.0<br>001<br>126<br>6 | 0.0<br>001<br>277<br>6 | 0.0<br>001<br>106<br>3 | 0.0<br>001<br>726<br>2 | 0.0<br>001<br>695<br>3 | 0.0<br>001<br>365<br>5 | 0.0<br>001<br>657<br>4  | 0.0<br>001<br>977<br>7 | 0.0<br>002<br>035<br>1 | 0.0<br>002<br>058<br>5 | 0.0<br>002<br>073<br>6 | 0.0<br>001<br>464<br>3 | 0.0<br>001<br>678<br>0 | 8.9<br>2E-<br>05       |
| Methionine                                                                      | 0.0<br>002<br>675<br>1 | 0.0<br>001<br>883<br>2 | 0.0<br>002<br>739<br>3 | 0.0<br>002<br>673<br>5 | 0.0<br>003<br>621<br>7 | 0.0<br>003<br>330<br>2 | 0.0<br>003<br>511<br>7 | 0.0<br>002<br>79<br>5   | 0.0<br>001<br>474<br>5 | 0.0<br>002<br>513<br>5 | 0.0<br>002<br>539<br>5 | 0.0<br>002<br>465<br>5 | 0.0<br>001<br>760<br>1 | 0.0<br>002<br>342<br>8 | 0.0<br>001<br>550<br>9 |
| Methionine Sulfoxide                                                            | 0.0<br>001<br>368<br>6 | 0.0<br>001<br>442<br>3 | 0.0<br>001<br>142<br>9 | 0.0<br>001<br>321<br>8 | 0.0<br>001<br>142<br>4 | 0.0<br>001<br>292<br>9 | 9.9<br>1E-<br>05       | 8.8<br>6E-<br>05        | 0.0<br>001<br>564<br>3 | 0.0<br>002<br>759<br>2 | 0.0<br>001<br>049<br>1 | 0.0<br>002<br>751<br>2 | 0.0<br>001<br>961<br>6 | 0.0<br>001<br>666<br>9 | 9.3<br>5E-<br>05       |
| Methyl (9E)-9-octadecenoate                                                     | 0.0<br>006<br>367<br>2 | 0.0<br>004<br>732<br>6 | 0.0<br>002<br>982<br>2 | 0.0<br>003<br>719<br>8 | 0.0<br>003<br>293<br>8 | 0.0<br>003<br>077<br>3 | 0.0<br>003<br>743<br>6 | 0.0<br>003<br>477<br>3  | 0.0<br>003<br>337<br>6 | 0.0<br>002<br>671<br>9 | 0.0<br>003<br>144<br>1 | 0.0<br>002<br>523<br>5 | 0.0<br>004<br>360<br>1 | 0.0<br>004<br>417<br>3 | 0.0<br>004<br>868<br>7 |
| Methyl (9Z,12Z,16E)-15-hydroperoxy-9,12,16-octadecatrienoate                    | 0.0<br>005<br>638<br>9 | 0.0<br>005<br>542<br>2 | 0.0<br>005<br>238<br>2 | 0.0<br>004<br>881<br>9 | 0.0<br>003<br>676<br>3 | 0.0<br>003<br>725<br>5 | 0.0<br>005<br>115<br>3 | 0.0<br>005<br>005<br>6  | 0.0<br>002<br>859<br>4 | 0.0<br>002<br>860<br>9 | 0.0<br>002<br>827<br>4 | 0.0<br>002<br>877<br>9 | 0.0<br>003<br>839<br>9 | 0.0<br>004<br>062<br>7 | 0.0<br>007<br>336<br>4 |
| Methyl palmitate                                                                | 0.0<br>019<br>410<br>5 | 0.0<br>017<br>931<br>1 | 0.0<br>012<br>483<br>9 | 0.0<br>014<br>095<br>4 | 0.0<br>012<br>574<br>5 | 0.0<br>011<br>886<br>3 | 0.0<br>014<br>574<br>6 | 0.0<br>013<br>182<br>5  | 0.0<br>012<br>053<br>2 | 0.0<br>011<br>743<br>2 | 0.0<br>010<br>010<br>2 | 0.0<br>009<br>361<br>9 | 0.0<br>019<br>171<br>3 | 0.0<br>015<br>072<br>5 | 0.0<br>017<br>468<br>5 |
| Methyl stearate                                                                 | 0.0<br>002<br>515<br>3 | 0.0<br>003<br>487<br>2 | 0.0<br>002<br>218<br>2 | 0.0<br>002<br>639<br>1 | 0.0<br>002<br>137<br>5 | 0.0<br>002<br>175<br>7 | 0.0<br>002<br>461<br>1 | 0.0<br>002<br>270<br>5  | 0.0<br>001<br>706<br>4 | 0.0<br>002<br>180<br>5 | 0.0<br>001<br>600<br>2 | 0.0<br>001<br>726<br>6 | 0.0<br>003<br>390<br>6 | 0.0<br>002<br>800<br>5 | 0.0<br>003<br>120<br>5 |
| MFCD00133435 (1-oleoyl-2-hydroxy-sn-glycero-3-phosphocholine)                   | 0.0<br>071<br>820<br>1 | 0.0<br>049<br>838<br>4 | 0.0<br>051<br>142<br>7 | 0.0<br>053<br>858<br>2 | 0.0<br>061<br>239<br>6 | 0.0<br>062<br>945<br>6 | 0.0<br>053<br>744<br>1 | 0.0<br>051<br>868<br>3  | 0.0<br>039<br>290<br>4 | 0.0<br>041<br>199<br>4 | 0.0<br>045<br>630<br>1 | 0.0<br>050<br>057<br>7 | 0.0<br>042<br>808<br>3 | 0.0<br>044<br>361<br>5 | 0.0<br>038<br>076<br>4 |
| MFCD00273074 (1-Heptadecanoyl-rac-glycerol)                                     | 0.0<br>001<br>379<br>5 | 0.0<br>001<br>723<br>4 | 0.0<br>001<br>514<br>6 | 0.0<br>001<br>745<br>6 | 0.0<br>001<br>651<br>8 | 0.0<br>001<br>389<br>8 | 0.0<br>001<br>646<br>3 | 0.0<br>001<br>697<br>2  | 0.0<br>001<br>214<br>5 | 0.0<br>001<br>369<br>2 | 0.0<br>001<br>199<br>5 | 0.0<br>001<br>235<br>6 | 0.0<br>001<br>51<br>5  | 0.0<br>001<br>513<br>1 | 0.0<br>001<br>556<br>7 |
| MFCD12546417 (3,4-Dihydroxybenzenesulfonic acid)                                | 0.0<br>001<br>336<br>3 | 0.0<br>001<br>174<br>3 | 0.0<br>002<br>255<br>5 | 0.0<br>001<br>296<br>5 | 8.1<br>5E-<br>05       | 0.0<br>001<br>154<br>4 | 9.2<br>2E-<br>05       | 8.4<br>4E-<br>05        | 2.7<br>0E-<br>05       | 5.4<br>7E-<br>05       | 7.1<br>9E-<br>05       | 2.3<br>8E-<br>05       | 9.9<br>6E-<br>05       | 6.0<br>6E-<br>05       | 9.1<br>2E-<br>05       |
| MFCD22416941 (Oleoyl-L-carnitine)                                               | 0.0<br>020<br>535<br>7 | 0.0<br>014<br>560<br>6 | 0.0<br>009<br>048<br>1 | 0.0<br>013<br>598<br>9 | 0.0<br>013<br>706<br>3 | 0.0<br>014<br>682<br>4 | 0.0<br>016<br>455<br>6 | 0.0<br>011<br>819<br>9  | 0.0<br>010<br>999<br>6 | 0.0<br>011<br>526<br>2 | 0.0<br>014<br>463<br>2 | 0.0<br>012<br>956<br>2 | 0.0<br>012<br>140<br>3 | 0.0<br>010<br>264<br>9 | 0.0<br>015<br>441<br>4 |
| MYRISTIC ACID                                                                   | 0.0<br>093<br>192<br>7 | 0.0<br>057<br>330<br>7 | 0.0<br>056<br>529<br>1 | 0.0<br>059<br>294<br>2 | 0.0<br>066<br>919<br>7 | 0.0<br>039<br>723<br>5 | 0.0<br>071<br>821<br>2 | 0.0<br>063<br>519<br>4  | 0.0<br>066<br>383<br>1 | 0.0<br>060<br>623<br>1 | 0.0<br>051<br>451<br>1 | 0.0<br>050<br>630<br>1 | 0.0<br>062<br>071<br>7 | 0.0<br>096<br>682<br>6 | 0.0<br>015<br>441<br>4 |
| Myristic Acid Alkyne                                                            | 0.0<br>008<br>444<br>4 | 0.0<br>007<br>160<br>3 | 0.0<br>005<br>162<br>8 | 0.0<br>006<br>855<br>6 | 0.0<br>006<br>616<br>9 | 0.0<br>003<br>667<br>5 | 0.0<br>007<br>641<br>7 | 0.0<br>005<br>332<br>1  | 0.0<br>004<br>043<br>3 | 0.0<br>004<br>095<br>3 | 0.0<br>003<br>330<br>7 | 0.0<br>004<br>482<br>6 | 0.0<br>005<br>507<br>9 | 0.0<br>007<br>132<br>1 | 0.0<br>011<br>132<br>1 |
| Myristoleic acid                                                                | 0.0<br>015<br>760<br>2 | 0.0<br>009<br>648<br>7 | 0.0<br>008<br>554<br>7 | 0.0<br>010<br>892<br>6 | 0.0<br>008<br>117<br>1 | 0.0<br>006<br>795<br>3 | 0.0<br>011<br>973<br>3 | 0.0<br>010<br>007<br>6  | 0.0<br>007<br>321<br>6 | 0.0<br>008<br>185<br>3 | 0.0<br>007<br>288<br>3 | 0.0<br>010<br>012<br>3 | 0.0<br>011<br>067<br>1 | 0.0<br>018<br>991<br>6 | 0.0<br>018<br>991<br>6 |
| N-[(2S,3R)-1-(beta-D-Glucopyranosyloxy)-3-hydroxy-2-octadecanyl]tetradecanamide | 8.4<br>2E-<br>05       | 6.5<br>5E-<br>05       | 7.7<br>8E-<br>05       | 6.1<br>3E-<br>05       | 8.4<br>8E-<br>05       | 8.2<br>2E-<br>05       | 6.9<br>2E-<br>05       | 8.4<br>0E-<br>05        | 9.4<br>5E-<br>05       | 9.8<br>5E-<br>05       | 9.9<br>001<br>020<br>1 | 9.9<br>2E-<br>05       | 7.7<br>8E-<br>05       | 8.3<br>1E-<br>05       | 4.6<br>5E-<br>05       |
| N-{15-Methyl-3-[(15-methylhexadecanoyl)oxy]hexadecanoyl}-L-serine               | 7.0<br>1E-<br>05       | 7.3<br>9E-<br>05       | 6.6<br>6E-<br>05       | 5.9<br>7E-<br>05       | 8.2<br>4E-<br>05       | 8.2<br>6E-<br>05       | 5.8<br>6E-<br>05       | 6.8<br>7E-<br>05        | 6.1<br>0E-<br>05       | 6.5<br>3E-<br>05       | 6.2<br>6E-<br>05       | 7.3<br>1E-<br>05       | 7.0<br>0E-<br>05       | 7.4<br>3E-<br>05       | 5.9<br>0E-<br>05       |
| N-Acetyl glycine                                                                | 0.0<br>001<br>528<br>1 | 0.0<br>002<br>611<br>1 | 0.0<br>002<br>884<br>7 | 0.0<br>002<br>308<br>5 | 0.0<br>001<br>546<br>4 | 0.0<br>003<br>938<br>5 | 0.0<br>002<br>382<br>4 | 0.0<br>003<br>103<br>9  | 0.0<br>002<br>895<br>3 | 0.0<br>001<br>580<br>2 | 0.0<br>002<br>181<br>7 | 0.0<br>002<br>364<br>7 | 0.0<br>002<br>538<br>8 | 0.0<br>001<br>977<br>2 | 0.0<br>002<br>405<br>4 |
| N-Benzylformamide                                                               | 9.9<br>0E-<br>05       | 3.6<br>5E-<br>05       | 8.8<br>4E-<br>05       | 9.4<br>9E-<br>05       | 0.0<br>001<br>375<br>6 | 0.0<br>001<br>083<br>6 | 0.0<br>001<br>440<br>2 | 0.0<br>001<br>4E-<br>05 | 4.7<br>2E-<br>05       | 7.5<br>2E-<br>05       | 7.1<br>9E-<br>05       | 7.3<br>0E-<br>05       | 4.0<br>3E-<br>05       | 6.3<br>6E-<br>05       | 3.6<br>1E-<br>05       |
| N,N-Diisopropylethylamine (DIPEA)                                               | 7.7<br>1E-<br>05       | 0.0<br>001<br>190<br>7 | 8.2<br>8E-<br>05       | 7.6<br>9E-<br>05       | 5.6<br>9E-<br>05       | 7.9<br>8E-<br>05       | 0.0<br>001<br>062<br>8 | 6.2<br>1E-<br>05        | 8.3<br>0E-<br>05       | 8.9<br>3E-<br>05       | 7.0<br>1E-<br>05       | 8.4<br>0E-<br>05       | 0.0<br>001<br>403<br>2 | 5.9<br>1E-<br>05       | 7.0<br>1E-<br>05       |
| N,N-DIMETHYLARGININE                                                            | 0.0<br>003<br>150<br>2 | 0.0<br>001<br>429<br>2 | 0.0<br>001<br>805<br>3 | 0.0<br>002<br>583<br>6 | 0.0<br>002<br>858<br>1 | 0.0<br>002<br>264<br>1 | 0.0<br>002<br>112<br>2 | 0.0<br>003<br>977<br>2  | 0.0<br>003<br>451<br>9 | 0.0<br>004<br>122<br>8 | 0.0<br>003<br>137<br>6 | 0.0<br>001<br>852<br>6 | 0.0<br>002<br>830<br>7 | 0.0<br>002<br>479<br>2 | 0.0<br>001<br>342<br>4 |
| N6-METHYLLYSINE                                                                 | 0.0<br>004<br>288<br>6 | 0.0<br>003<br>651<br>7 | 0.0<br>002<br>361<br>9 | 0.0<br>002<br>535<br>3 | 0.0<br>002<br>517<br>3 | 0.0<br>002<br>932<br>5 | 0.0<br>003<br>764<br>4 | 0.0<br>002<br>265<br>6  | 0.0<br>008<br>922<br>1 | 0.0<br>007<br>548<br>7 | 0.0<br>005<br>977<br>5 | 0.0<br>005<br>73<br>42 | 0.0<br>004<br>005<br>8 | 0.0<br>005<br>724<br>8 | 0.0<br>002<br>574<br>9 |

|                                  |                        |                        |                        |                        |                        |                        |                        |                        |                        |                        |                        |                        |                        |                        |                        |
|----------------------------------|------------------------|------------------------|------------------------|------------------------|------------------------|------------------------|------------------------|------------------------|------------------------|------------------------|------------------------|------------------------|------------------------|------------------------|------------------------|
| Nervonic acid                    | 0.0<br>001<br>135<br>1 | 0.0<br>001<br>436<br>2 | 0.0<br>001<br>021<br>5 | 0.0<br>001<br>495<br>6 | 0.0<br>001<br>344<br>6 | 0.0<br>001<br>323<br>6 | 0.0<br>001<br>759<br>4 | 0.0<br>001<br>192<br>5 | 6.9<br>4E-<br>05       | 0.0<br>001<br>094<br>7 | 0.0<br>001<br>099<br>2 | 9.3<br>4E-<br>05       | 0.0<br>001<br>423<br>1 | 0.0<br>001<br>244<br>1 | 0.0<br>001<br>128<br>6 |
| Nicotinamide                     | 0.0<br>009<br>464<br>4 | 0.0<br>016<br>259<br>4 | 0.0<br>024<br>865<br>4 | 0.0<br>018<br>6<br>5   | 0.0<br>017<br>787<br>7 | 0.0<br>017<br>209<br>5 | 0.0<br>014<br>462<br>6 | 0.0<br>019<br>357<br>9 | 0.0<br>010<br>217<br>5 | 0.0<br>013<br>015<br>6 | 0.0<br>014<br>216<br>6 | 0.0<br>012<br>411<br>5 | 0.0<br>015<br>524<br>3 | 0.0<br>015<br>850<br>8 | 0.0<br>018<br>447<br>8 |
| O-ACETYLCARNITINE                | 0.0<br>032<br>581<br>5 | 0.0<br>044<br>815<br>2 | 0.0<br>062<br>084<br>2 | 0.0<br>043<br>973<br>1 | 0.0<br>030<br>973<br>4 | 0.0<br>065<br>191<br>2 | 0.0<br>036<br>977<br>3 | 0.0<br>031<br>298<br>5 | 0.0<br>020<br>174<br>5 | 0.0<br>030<br>759<br>5 | 0.0<br>026<br>174<br>5 | 0.0<br>027<br>174<br>5 | 0.0<br>033<br>975<br>1 | 0.0<br>028<br>682<br>1 | 0.0<br>030<br>862<br>2 |
| O-ureido-D-serine                | 0.0<br>059<br>697<br>6 | 0.0<br>051<br>549<br>8 | 0.0<br>066<br>433<br>5 | 0.0<br>056<br>043<br>3 | 0.0<br>077<br>644<br>7 | 0.0<br>060<br>644<br>8 | 0.0<br>044<br>655<br>1 | 0.0<br>035<br>781<br>8 | 0.0<br>095<br>501<br>8 | 0.0<br>072<br>569<br>8 | 0.0<br>063<br>811<br>5 | 0.0<br>079<br>921<br>1 | 0.0<br>074<br>279<br>1 | 0.0<br>040<br>904<br>3 | 0.0<br>042<br>695<br>3 |
| Octadecadienoic acid             | 0.1<br>017<br>353<br>7 | 0.0<br>998<br>377<br>6 | 0.0<br>947<br>509<br>3 | 0.0<br>949<br>830<br>8 | 0.0<br>843<br>251<br>8 | 0.0<br>776<br>001<br>8 | 0.0<br>965<br>265<br>2 | 0.0<br>937<br>082<br>2 | 0.0<br>896<br>666<br>4 | 0.0<br>759<br>009<br>4 | 0.0<br>776<br>448<br>9 | 0.0<br>802<br>753<br>3 | 0.0<br>866<br>454<br>3 | 0.0<br>890<br>054<br>3 | 0.1<br>193<br>328<br>9 |
| ODYA (17-octadecynoic acid)      | 0.0<br>007<br>580<br>2 | 0.0<br>007<br>466<br>1 | 0.0<br>007<br>431<br>3 | 0.0<br>005<br>891<br>9 | 0.0<br>004<br>590<br>9 | 0.0<br>003<br>985<br>9 | 0.0<br>006<br>450<br>6 | 0.0<br>005<br>819<br>9 | 0.0<br>003<br>685<br>2 | 0.0<br>003<br>815<br>2 | 0.0<br>002<br>718<br>2 | 0.0<br>003<br>368<br>2 | 0.0<br>005<br>306<br>5 | 0.0<br>007<br>156<br>1 | 0.0<br>013<br>358<br>6 |
| Ornithine                        | 0.0<br>013<br>564<br>6 | 0.0<br>006<br>960<br>8 | 0.0<br>009<br>367<br>3 | 0.0<br>008<br>583<br>6 | 0.0<br>020<br>492<br>2 | 0.0<br>020<br>683<br>5 | 0.0<br>012<br>690<br>2 | 0.0<br>008<br>547<br>4 | 0.0<br>013<br>064<br>2 | 0.0<br>013<br>029<br>8 | 0.0<br>020<br>207<br>4 | 0.0<br>012<br>973<br>7 | 0.0<br>009<br>195<br>2 | 0.0<br>013<br>676<br>9 | 0.0<br>007<br>676<br>8 |
| Palmitic acid                    | 0.0<br>500<br>569<br>4 | 0.0<br>561<br>692<br>1 | 0.0<br>582<br>572<br>3 | 0.0<br>616<br>282<br>2 | 0.0<br>530<br>787<br>1 | 0.0<br>498<br>806<br>4 | 0.0<br>549<br>951<br>1 | 0.0<br>582<br>246<br>2 | 0.0<br>397<br>853<br>1 | 0.0<br>490<br>216<br>1 | 0.0<br>409<br>339<br>2 | 0.0<br>419<br>544<br>1 | 0.0<br>490<br>050<br>9 | 0.0<br>449<br>697<br>7 | 0.0<br>620<br>545<br>7 |
| PALMITOLEIC ACID                 | 0.0<br>293<br>618<br>9 | 0.0<br>223<br>086<br>3 | 0.0<br>223<br>373<br>4 | 0.0<br>214<br>544<br>9 | 0.0<br>188<br>646<br>4 | 0.0<br>169<br>977<br>1 | 0.0<br>244<br>672<br>3 | 0.0<br>229<br>235<br>8 | 0.0<br>233<br>428<br>5 | 0.0<br>234<br>915<br>3 | 0.0<br>213<br>587<br>0 | 0.0<br>222<br>587<br>2 | 0.0<br>237<br>241<br>2 | 0.0<br>228<br>358<br>1 | 0.0<br>328<br>680<br>1 |
| Palmitoyl sphingomyelin          | 0.0<br>001<br>626<br>3 | 0.0<br>002<br>184<br>4 | 0.0<br>002<br>257<br>4 | 0.0<br>002<br>306<br>8 | 0.0<br>001<br>002<br>5 | 0.0<br>002<br>243<br>5 | 0.0<br>002<br>521<br>3 | 0.0<br>000<br>107<br>9 | 0.0<br>001<br>001<br>8 | 0.0<br>001<br>842<br>3 | 0.0<br>001<br>001<br>9 | 0.0<br>001<br>564<br>3 | 0.0<br>001<br>631<br>6 | 0.0<br>001<br>262<br>7 | 0.0<br>002<br>254<br>8 |
| Palmitoyl-DL-carnitine           | 0.0<br>019<br>112<br>9 | 0.0<br>014<br>833<br>7 | 0.0<br>011<br>477<br>5 | 0.0<br>013<br>822<br>1 | 0.0<br>014<br>356<br>4 | 0.0<br>013<br>200<br>8 | 0.0<br>016<br>941<br>8 | 0.0<br>010<br>985<br>6 | 0.0<br>010<br>472<br>4 | 0.0<br>011<br>444<br>6 | 0.0<br>013<br>580<br>6 | 0.0<br>012<br>140<br>3 | 0.0<br>013<br>511<br>4 | 0.0<br>017<br>911<br>2 | 0.0<br>017<br>911<br>1 |
| para-Cresol Sulfate              | 0.0<br>004<br>954<br>9 | 0.0<br>017<br>145<br>8 | 0.0<br>016<br>379<br>9 | 0.0<br>015<br>174<br>4 | 0.0<br>006<br>506<br>9 | 0.0<br>013<br>575<br>2 | 0.0<br>008<br>276<br>7 | 0.0<br>008<br>134<br>4 | 0.0<br>001<br>706<br>1 | 0.0<br>004<br>297<br>4 | 0.0<br>001<br>386<br>2 | 0.0<br>002<br>851<br>5 | 0.0<br>005<br>663<br>8 | 0.0<br>007<br>936<br>3 | 0.0<br>003<br>985<br>3 |
| PC                               | 0.0<br>168<br>554<br>9 | 0.0<br>240<br>050<br>2 | 0.0<br>212<br>658<br>2 | 0.0<br>201<br>577<br>8 | 0.0<br>201<br>813<br>4 | 0.0<br>222<br>156<br>8 | 0.0<br>191<br>873<br>5 | 0.0<br>219<br>094<br>5 | 0.0<br>201<br>671<br>8 | 0.0<br>202<br>702<br>9 | 0.0<br>010<br>864<br>8 | 0.0<br>255<br>873<br>8 | 0.0<br>201<br>989<br>5 | 0.0<br>220<br>55<br>5  | 0.0<br>214<br>500<br>4 |
| Pentacosanoic acid               | 4.0<br>5E-<br>06       | 4.5<br>8E-<br>06       | 4.2<br>9E-<br>06       | 4.5<br>2E-<br>06       | 4.6<br>0E-<br>06       | 4.5<br>3E-<br>06       | 4.6<br>7E-<br>06       | 4.1<br>0E-<br>06       | 5.3<br>7E-<br>06       | 5.2<br>1E-<br>06       | 5.7<br>3E-<br>06       | 6.9<br>8E-<br>06       | 5.1<br>2E-<br>06       | 4.9<br>6E-<br>06       | 4.1<br>6E-<br>06       |
| Pentadecanoic acid               | 0.0<br>009<br>402<br>8 | 0.0<br>010<br>886<br>9 | 0.0<br>007<br>921<br>7 | 0.0<br>008<br>104<br>2 | 0.0<br>008<br>443<br>1 | 0.0<br>006<br>593<br>1 | 0.0<br>009<br>593<br>2 | 0.0<br>007<br>885<br>1 | 0.0<br>007<br>692<br>2 | 0.0<br>006<br>692<br>2 | 0.0<br>006<br>327<br>4 | 0.0<br>006<br>378<br>3 | 0.0<br>010<br>378<br>9 | 0.0<br>007<br>109<br>4 | 0.0<br>008<br>237<br>4 |
| PG(16:1(9Z)/20:4(5Z,8Z,11Z,14Z)) | 2.2<br>2E-<br>05       | 1.4<br>2E-<br>05       | 1.4<br>5E-<br>05       | 1.1<br>5E-<br>05       | 2.5<br>2E-<br>05       | 2.3<br>1E-<br>05       | 2.0<br>6E-<br>05       | 2.4<br>2E-<br>05       | 2.9<br>4E-<br>05       | 2.9<br>3E-<br>05       | 2.7<br>1E-<br>05       | 2.8<br>1E-<br>05       | 1.9<br>4E-<br>05       | 2.1<br>6E-<br>05       | 1.0<br>4E-<br>05       |
| PHENYLALANINE                    | 0.0<br>102<br>001<br>5 | 0.0<br>112<br>130<br>7 | 0.0<br>140<br>944<br>7 | 0.0<br>134<br>240<br>7 | 0.0<br>128<br>148<br>6 | 0.0<br>146<br>534<br>6 | 0.0<br>151<br>434<br>1 | 0.0<br>130<br>592<br>9 | 0.0<br>112<br>434<br>9 | 0.0<br>124<br>465<br>2 | 0.0<br>129<br>123<br>6 | 0.0<br>113<br>760<br>7 | 0.0<br>110<br>447<br>7 | 0.0<br>121<br>060<br>7 | 0.0<br>017<br>203<br>4 |
| Phosphoric acid                  | 0.0<br>011<br>692<br>7 | 0.0<br>012<br>381<br>8 | 0.0<br>019<br>975<br>5 | 0.0<br>019<br>702<br>7 | 0.0<br>019<br>017<br>6 | 0.0<br>016<br>594<br>9 | 0.0<br>017<br>218<br>9 | 0.0<br>011<br>427<br>9 | 0.0<br>010<br>940<br>4 | 0.0<br>009<br>415<br>9 | 0.0<br>010<br>159<br>6 | 0.0<br>012<br>437<br>2 | 0.0<br>014<br>985<br>1 | 0.0<br>011<br>985<br>9 | 0.0<br>015<br>096<br>7 |
| PHOSPHORYLCHOLINE                | 0.0<br>006<br>152<br>9 | 0.0<br>006<br>855<br>5 | 0.0<br>007<br>33<br>3  | 0.0<br>007<br>381<br>2 | 0.0<br>006<br>380<br>3 | 0.0<br>008<br>506<br>7 | 0.0<br>007<br>209<br>3 | 0.0<br>007<br>267<br>6 | 0.0<br>005<br>291<br>3 | 0.0<br>007<br>020<br>3 | 0.0<br>006<br>291<br>5 | 0.0<br>006<br>722<br>5 | 0.0<br>006<br>184<br>6 | 0.0<br>006<br>540<br>6 | 0.0<br>006<br>498<br>7 |
| Prolinamide                      | 0.0<br>002<br>575<br>3 | 7.9<br>6E-<br>05       | 0.0<br>001<br>696<br>1 | 0.0<br>001<br>169<br>3 | 0.0<br>003<br>408<br>3 | 0.0<br>002<br>230<br>2 | 0.0<br>002<br>040<br>9 | 8.4<br>5E-<br>05       | 0.0<br>002<br>404<br>6 | 0.0<br>003<br>090<br>1 | 0.0<br>003<br>162<br>1 | 0.0<br>003<br>518<br>6 | 0.0<br>001<br>684<br>6 | 0.0<br>001<br>554<br>6 | 0.0<br>001<br>337<br>8 |
| Proline                          | 0.0<br>039<br>677<br>2 | 0.0<br>021<br>306<br>1 | 0.0<br>023<br>999<br>2 | 0.0<br>025<br>296<br>5 | 0.0<br>036<br>968<br>6 | 0.0<br>028<br>751<br>1 | 0.0<br>031<br>036<br>9 | 0.0<br>025<br>904<br>6 | 0.0<br>019<br>437<br>2 | 0.0<br>028<br>755<br>3 | 0.0<br>023<br>961<br>9 | 0.0<br>023<br>574<br>3 | 0.0<br>023<br>132<br>7 | 0.0<br>025<br>499<br>7 | 0.0<br>017<br>203<br>4 |
| Proline Betaine (Stachydrine)    | 0.0<br>008<br>371<br>2 | 0.0<br>003<br>559<br>9 | 0.0<br>004<br>623<br>9 | 0.0<br>004<br>901<br>7 | 0.0<br>005<br>354<br>3 | 0.0<br>005<br>023<br>3 | 0.0<br>006<br>264<br>4 | 0.0<br>003<br>157<br>3 | 0.0<br>001<br>72<br>4  | 0.0<br>006<br>26<br>8  | 0.0<br>002<br>587<br>1 | 0.0<br>001<br>717<br>1 | 0.0<br>003<br>957<br>7 | 0.0<br>003<br>518<br>4 | 0.0<br>002<br>842<br>1 |
| Propionylcarnitine               | 0.0<br>002<br>592<br>6 | 0.0<br>001<br>185<br>4 | 0.0<br>001<br>636<br>6 | 0.0<br>001<br>771<br>2 | 0.0<br>003<br>492<br>3 | 0.0<br>001<br>373<br>3 | 0.0<br>002<br>216<br>9 | 0.0<br>001<br>486<br>5 | 0.0<br>002<br>332<br>3 | 0.0<br>001<br>762<br>3 | 0.0<br>001<br>001<br>5 | 0.0<br>001<br>782<br>5 | 0.0<br>001<br>150<br>2 | 0.0<br>001<br>854<br>1 | 0.0<br>001<br>393<br>8 |
| Prostaglandin F1E± Alcohol       | 0.0<br>003<br>175<br>8 | 0.0<br>002<br>014<br>9 | 0.0<br>003<br>189<br>9 | 0.0<br>003<br>053<br>3 | 0.0<br>002<br>749<br>9 | 0.0<br>002<br>388<br>6 | 0.0<br>003<br>047<br>6 | 0.0<br>003<br>925<br>9 | 0.0<br>002<br>558<br>6 | 0.0<br>002<br>558<br>1 | 0.0<br>003<br>405<br>5 | 0.0<br>002<br>001<br>9 | 0.0<br>001<br>986<br>6 | 0.0<br>002<br>434<br>5 | 0.0<br>002<br>942<br>5 |
| ricinelaidic acid                | 3.8<br>7E-<br>05       | 2.9<br>3E-<br>05       | 1.6<br>0E-<br>05       | 2.7<br>0E-<br>05       | 3.0<br>0E-<br>05       | 1.2<br>4E-<br>05       | 3.2<br>1E-<br>05       | 1.9<br>6E-<br>05       | 1.9<br>1E-<br>05       | 1.9<br>8E-<br>05       | 1.3<br>2E-<br>05       | 1.3<br>2E-<br>05       | 2.6<br>3E-<br>05       | 2.9<br>7E-<br>05       | 3.4<br>2E-<br>05       |
| SEROTONIN                        | 1.3<br>6E-<br>05       | 0.0<br>005<br>012      | 0.0<br>004<br>012      | 0.0<br>004<br>012      | 1.5<br>0E-<br>05       | 1.7<br>1E-<br>05       | 1.5<br>7E-<br>05       | 1.6<br>0E-<br>05       | 1.4<br>0E-<br>05       | 1.6<br>2E-<br>05       | 1.3<br>8E-<br>05       | 1.7<br>1E-<br>05       | 1.4<br>3E-<br>05       | 1.4<br>4E-<br>05       | 0.0<br>002             |

|                                   |                        |                        |                        |                        |                        |                        |                        |                        |                        |                        |                        |                        |                        |                        |                        |          |
|-----------------------------------|------------------------|------------------------|------------------------|------------------------|------------------------|------------------------|------------------------|------------------------|------------------------|------------------------|------------------------|------------------------|------------------------|------------------------|------------------------|----------|
|                                   |                        | 557<br>5               | 733<br>7               | 177<br>4               |                        |                        |                        |                        |                        |                        |                        |                        |                        |                        |                        | 093<br>8 |
| soyasapogenol A                   | 3.1<br>1E-<br>05       | 2.1<br>6E-<br>05       | 2.4<br>4E-<br>05       | 2.2<br>9E-<br>05       | 2.0<br>3E-<br>05       | 2.1<br>4E-<br>05       | 2.2<br>0E-<br>05       | 2.5<br>1E-<br>05       | 1.8<br>6E-<br>05       | 1.9<br>4E-<br>05       | 1.8<br>3E-<br>05       | 2.2<br>8E-<br>05       | 1.9<br>8E-<br>05       | 1.9<br>8E-<br>05       | 2.9<br>6E-<br>05       |          |
| Sphingosine                       | 4.0<br>6E-<br>05       | 3.0<br>8E-<br>05       | 3.3<br>0E-<br>05       | 3.7<br>2E-<br>05       | 3.7<br>2E-<br>05       | 2.3<br>8E-<br>05       | 3.8<br>5E-<br>05       | 2.7<br>6E-<br>05       | 2.4<br>4E-<br>05       | 2.8<br>1E-<br>05       | 2.6<br>1E-<br>05       | 3.0<br>0E-<br>05       | 2.9<br>1E-<br>05       | 3.5<br>2E-<br>05       | 3.2<br>5E-<br>05       |          |
| Stearic acid                      | 0.0<br>160<br>701<br>7 | 0.0<br>187<br>206      | 0.0<br>164<br>759<br>2 | 0.0<br>206<br>529<br>2 | 0.0<br>170<br>227<br>6 | 0.0<br>173<br>213<br>8 | 0.0<br>179<br>882<br>6 | 0.0<br>199<br>811<br>6 | 0.0<br>141<br>234<br>8 | 0.0<br>150<br>974<br>8 | 0.0<br>141<br>707<br>9 | 0.0<br>149<br>319<br>4 | 0.0<br>196<br>355<br>1 | 0.0<br>180<br>546<br>9 | 0.0<br>198<br>222<br>3 |          |
| Taurine                           | 0.0<br>014<br>428<br>5 | 0.0<br>015<br>107      | 0.0<br>020<br>853<br>6 | 0.0<br>019<br>234<br>2 | 0.0<br>013<br>053<br>6 | 0.0<br>014<br>340<br>6 | 0.0<br>021<br>285<br>1 | 0.0<br>015<br>467<br>1 | 0.0<br>004<br>767<br>2 | 0.0<br>008<br>464<br>7 | 0.0<br>009<br>791<br>1 | 0.0<br>008<br>215<br>1 | 0.0<br>013<br>531<br>5 | 0.0<br>009<br>887<br>4 | 0.0<br>016<br>669<br>6 |          |
| Tetraneurin E                     | 7.9<br>1E-<br>06       | 9.8<br>3E-<br>06       | 9.9<br>1E-<br>06       | 1.0<br>6E-<br>05       | 9.7<br>7E-<br>06       | 9.7<br>0E-<br>06       | 1.1<br>3E-<br>05       | 1.1<br>7E-<br>05       | 8.8<br>3E-<br>06       | 1.0<br>2E-<br>05       | 9.1<br>9E-<br>06       | 9.4<br>4E-<br>06       | 8.9<br>2E-<br>06       | 9.5<br>8E-<br>06       | 9.1<br>7E-<br>06       |          |
| trans-10-Heptadecenoic acid       | 0.0<br>015<br>463<br>8 | 0.0<br>012<br>803<br>5 | 0.0<br>009<br>659<br>2 | 0.0<br>009<br>668<br>9 | 0.0<br>008<br>194<br>2 | 0.0<br>008<br>426<br>8 | 0.0<br>010<br>842<br>8 | 0.0<br>009<br>990<br>8 | 0.0<br>009<br>332<br>4 | 0.0<br>008<br>894<br>4 | 0.0<br>009<br>593<br>9 | 0.0<br>008<br>311<br>5 | 0.0<br>011<br>220<br>2 | 0.0<br>011<br>261<br>2 | 0.0<br>013<br>940<br>4 |          |
| trans-2-Tetradecenoyl-L-carnitine | 0.0<br>006<br>471<br>4 | 0.0<br>003<br>975<br>1 | 0.0<br>002<br>655<br>8 | 0.0<br>004<br>693<br>2 | 0.0<br>004<br>696<br>2 | 0.0<br>003<br>533<br>3 | 0.0<br>004<br>258<br>3 | 0.0<br>003<br>448<br>6 | 0.0<br>002<br>137<br>5 | 0.0<br>003<br>655<br>5 | 0.0<br>003<br>598<br>6 | 0.0<br>003<br>746<br>9 | 0.0<br>003<br>843<br>4 | 0.0<br>006<br>523<br>7 | 0.0<br>006<br>523<br>7 |          |
| trans-3-Indoleacrylic acid        | 0.0<br>056<br>109<br>1 | 0.0<br>086<br>273<br>4 | 0.0<br>069<br>566      | 0.0<br>073<br>946      | 0.0<br>070<br>297      | 0.0<br>083<br>535<br>9 | 0.0<br>068<br>275<br>9 | 0.0<br>077<br>279<br>5 | 0.0<br>058<br>956<br>6 | 0.0<br>082<br>550<br>9 | 0.0<br>111<br>933<br>6 | 0.0<br>087<br>801<br>1 | 0.0<br>072<br>580<br>2 | 0.0<br>062<br>649<br>4 | 0.0<br>053<br>746<br>3 |          |
| TRANS-ACONITATE                   | 0.0<br>003<br>182<br>7 | 0.0<br>002<br>937<br>8 | 0.0<br>002<br>202<br>7 | 0.0<br>001<br>923<br>5 | 0.0<br>001<br>175<br>3 | 0.0<br>001<br>771<br>8 | 0.0<br>002<br>332<br>7 | 0.0<br>001<br>889<br>5 | 0.0<br>003<br>167<br>1 | 0.0<br>003<br>323<br>6 | 0.0<br>002<br>564<br>8 | 0.0<br>003<br>908<br>1 | 0.0<br>003<br>089<br>5 | 0.0<br>002<br>780<br>8 | 0.0<br>002<br>294<br>6 |          |
| Tridecanoic acid                  | 0.0<br>001<br>978<br>2 | 0.0<br>001<br>717<br>8 | 0.0<br>001<br>228      | 0.0<br>001<br>901<br>8 | 0.0<br>001<br>236<br>1 | 0.0<br>001<br>135<br>5 | 0.0<br>001<br>862<br>4 | 0.0<br>001<br>447<br>3 | 9.1<br>5E-<br>05       | 0.0<br>001<br>359<br>6 | 8.4<br>7E-<br>05       | 0.0<br>001<br>038<br>5 | 0.0<br>001<br>048<br>2 | 0.0<br>001<br>511<br>1 | 0.0<br>002<br>056<br>3 |          |
| TRYPTOPHAN                        | 0.0<br>005<br>869<br>6 | 0.0<br>009<br>310<br>5 | 0.0<br>008<br>048<br>7 | 0.0<br>007<br>940<br>1 | 0.0<br>007<br>666<br>9 | 0.0<br>008<br>216<br>1 | 0.0<br>008<br>448<br>5 | 0.0<br>008<br>166<br>1 | 0.0<br>004<br>201<br>5 | 0.0<br>006<br>345<br>8 | 0.0<br>008<br>156<br>8 | 0.0<br>006<br>778<br>8 | 0.0<br>005<br>953<br>4 | 0.0<br>005<br>135<br>6 | 0.0<br>005<br>583<br>7 |          |
| Typhasterol                       | 7.0<br>2E-<br>05       | 7.4<br>3E-<br>05       | 7.0<br>6E-<br>05       | 6.9<br>9E-<br>05       | 6.1<br>9E-<br>05       | 5.8<br>8E-<br>05       | 7.3<br>0E-<br>05       | 6.8<br>4E-<br>05       | 6.4<br>9E-<br>05       | 6.6<br>4E-<br>05       | 5.9<br>0E-<br>05       | 6.8<br>9E-<br>05       | 6.8<br>5E-<br>05       | 6.6<br>3E-<br>05       | 7.4<br>5E-<br>05       |          |
| TYROSINE                          | 0.0<br>003<br>167<br>1 | 0.0<br>002<br>879<br>7 | 0.0<br>002<br>918      | 0.0<br>003<br>261<br>4 | 0.0<br>003<br>978<br>4 | 0.0<br>003<br>321<br>1 | 0.0<br>004<br>401      | 0.0<br>002<br>607      | 0.0<br>001<br>316      | 0.0<br>002<br>046<br>4 | 0.0<br>001<br>970<br>1 | 0.0<br>001<br>877<br>5 | 0.0<br>001<br>985<br>6 | 0.0<br>002<br>314<br>2 | 0.0<br>002<br>593<br>8 |          |
| Uric acid                         | 0.0<br>007<br>860<br>5 | 0.0<br>005<br>791<br>9 | 0.0<br>008<br>424<br>7 | 0.0<br>007<br>186<br>2 | 0.0<br>006<br>923<br>2 | 0.0<br>004<br>013      | 0.0<br>006<br>390<br>9 | 0.0<br>005<br>724<br>5 | 0.0<br>007<br>162<br>3 | 0.0<br>007<br>134<br>6 | 0.0<br>005<br>160<br>5 | 0.0<br>006<br>503<br>3 | 0.0<br>005<br>208<br>3 | 0.0<br>005<br>852<br>3 | 0.0<br>007<br>729<br>1 |          |
| Valine                            | 0.0<br>009             | 0.0<br>007<br>527<br>7 | 0.0<br>009<br>76       | 0.0<br>009<br>501<br>7 | 0.0<br>012<br>334<br>8 | 0.0<br>014<br>295<br>6 | 0.0<br>009<br>771      | 0.0<br>011<br>099<br>8 | 0.0<br>009<br>913<br>6 | 0.0<br>011<br>237<br>6 | 0.0<br>014<br>967<br>5 | 0.0<br>009<br>967<br>3 | 0.0<br>011<br>065<br>8 | 0.0<br>010<br>181<br>5 | 0.0<br>009<br>212<br>5 |          |
| Valproic acid                     | 2.2<br>3E-<br>05       | 4.3<br>7E-<br>05       | 1.6<br>5E-<br>05       | 1.7<br>6E-<br>05       | 1.0<br>8E-<br>05       | 1.2<br>7E-<br>05       | 1.2<br>1E-<br>05       | 1.0<br>7E-<br>05       | 1.8<br>9E-<br>05       | 1.7<br>1E-<br>05       | 2.3<br>3E-<br>05       | 1.9<br>4E-<br>05       | 2.6<br>3E-<br>05       | 1.5<br>6E-<br>05       | 5.7<br>4E-<br>05       |          |
| Hydroxyisobutyric acid            | 0.0<br>017<br>133<br>2 | 0.0<br>023<br>234<br>8 | 0.0<br>018<br>086<br>7 | 0.0<br>024<br>048      | 0.0<br>016<br>009<br>8 | 0.0<br>029<br>999      | 0.0<br>014<br>457<br>1 | 0.0<br>023<br>603<br>2 | 0.0<br>024<br>250<br>8 | 0.0<br>035<br>585      | 0.0<br>025<br>790<br>1 | 0.0<br>037<br>082<br>8 | 0.0<br>033<br>132<br>9 | 0.0<br>034<br>167<br>9 | 0.0<br>032<br>638<br>4 |          |
